# Supplementary material for: Solid phase synthesis of α-amino squaric acid-containing peptides
Source: Royal Society of Chemistry journal article supplement (doi:10.1039/c4ra10442k), 2014-01-01

## Supporting information

### Synthesis of $\alpha$ -Amino Squaric Acid-containing Peptide on Solid Phase

Kentaro Maeda,<sup>1</sup> Yu-ichi Kiniwa,<sup>1</sup> Yasufumi Ohfune,<sup>1</sup> Shinichi Ishiguro,<sup>2</sup> and Koichi Suzuki,<sup>2</sup>

Kazuya Murata,<sup>3</sup> Hideaki Matsuda,<sup>3</sup> and Tetsuro Shinada <sup>1\*</sup>

<sup>a</sup> Graduate School of Science, Osaka City University, 3-3-138, Sugimoto, Sumiyoshi, Osaka 558-8585, Japan

<sup>b</sup> Office of Research Exchange, Iwate University, 3-18-8 Ueda, Morioka, Iwate 020-8550, Japan

<sup>c</sup> Faculty of Pharmacy, Kinki University, 3-4-1 Kowakae, Higashiosaka City, Osaka 577-8502, Japan

#### General Information:

All reagents and solvents were purchased from either Aldrich Chemical Company, Inc., Merck & Co., Inc., Nacalai Tesque Company, Ltd., Peptide Institute, Tokyo Kasei Kogyo Co., Ltd., Wako Pure Chemical Industries, Ltd., or Watanabe Chemical Industries, Ltd. and used without further purification unless otherwise indicated. Dichloromethane (CH<sub>2</sub>Cl<sub>2</sub>) was distilled from phosphoric pentaoxide (P<sub>2</sub>O<sub>5</sub>). Tetrahydrofuran (THF), Acetonitrile (CH<sub>3</sub>CN) and dimethylformamide (DMF) of anhydrous grade were used.

Optical rotations were taken on a JASCO P-1030 polarimeter with a sodium lamp (D line). FTIR spectra was measured on a JASCO FT/IR-6200 infrared spectrophotometer. <sup>1</sup>H NMR spectra were reported on an either Bruker AVANCE-300 or JEOL JNM-LA 400 (400 MHz) spectrometer. Chemical shifts of <sup>1</sup>H NMR were reported as  $\delta$  values in ppm relative to CHCl<sub>3</sub> ( $\delta$  = 7.26) in CDCl<sub>3</sub>, CD<sub>2</sub>HOD ( $\delta$  = 3.31) in CD<sub>3</sub>OD, HDO ( $\delta$  = 4.79) in D<sub>2</sub>O. Chemical shifts of <sup>13</sup>C NMR spectra were reported as  $\delta$  values in ppm relative to CHCl<sub>3</sub> ( $\delta$  = 77.0) in CDCl<sub>3</sub>, CH<sub>3</sub>OH ( $\delta$  = 49.0) in CD<sub>3</sub>OD. Low resolution mass spectra (LRMS) and High resolution mass spectra (HRMS) were obtained on a JEOL JMS-AX500 for fast atom bombardment ionization (FAB) or Bruker solariX XR (9.4T) for electrospray ionization (ESI). Mass spectra of peptide library were obtained on a KRATOS AXIMA-CFRplus (SHIMAZU) for matrix assisted laser desorption/ionization (MALDI).

All reactions were monitored by thin layer chromatography (TLC), which was performed with precoated plates (silica gel 60 F-254, 0.25 mm layer thickness, manufactured by Merck). TLC visualization was accompanied using UV lamp (254 nm), ninhydrin solution (TCI N-094) or phosphomolybdic acid solution (10 g dissolved in 150 mL of EtOH). Daisogel IR-60 1002W(40/63 mm) was used for flash column chromatography on silica gel. Reversed phase chromatography was performed on Cosmosil® 140C<sub>18</sub>-PREP.

***tert*-Butyl 2-(((9H-fluoren-9-yl)methoxy)carbonyl)amino)-2-(1-hydroxy-2,3-diisopropoxy-4-oxocyclobut-2-en-1-yl)acetate (**7**)**

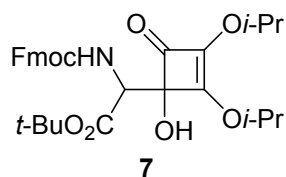

To a solution of **5** (6.40 g, 13.8 mmol) in MeOH (28 mL) was added 20% Pd-C (1.28 g) at room temperature. The mixture was stirred under H<sub>2</sub> for 3 h at room temperature, filtrated through and a celite pad. The filtrate was concentrated *in vacuo* to give amine **6** (4.59 g). The amine was subjected to the next step without purification. FmocOSu (4.65 g, 13.8 mmol) was added to a solution of **6** (4.59 g) in CH<sub>3</sub>CN (16 ml) at room temperature. The mixture was stirred for 4 h and concentrated *in vacuo*. The residue was purified by flash column chromatography on silica gel (*n*-hexane/EtOAc = 10/1-1/1) to give **7** (6.19 g, 81% from **5**), a 1:2 inseparable mixture as yellow oil: FTIR (neat) 3409, 2979, 2935, 1770, 1729, 1621, 1515, 1452, 1386, 1375, 1321, 1218, 1157, 1099, 1056 cm<sup>-1</sup>; <sup>1</sup>H NMR (300 MHz, CDCl<sub>3</sub>) δ 7.75 (d, *J* = 7.2 Hz, 2H), 7.61 (d, *J* = 7.2 Hz, 2H), 7.39 (t, *J* = 7.2 Hz, 2H), 7.30 (t, *J* = 7.2 Hz, 2H), 5.83 (br d, 2/3H), 5.68 (br d, 1/3H), 4.94-4.81 (m, 2H), 4.72 (m, 1H), 4.37 (d, *J* = 6.9 Hz, 2H), 4.22 (d, *J* = 7.2 Hz, 1H), 1.51 (s, 3H), 1.49 (s, 6H), 1.39-1.23 (m, 12H); <sup>13</sup>C NMR (75 MHz, CDCl<sub>3</sub>) δ 182.1, 181.5, 168.2, 163.6, 163.4, 156.4, 143.7, 141.2, 133.1, 132.7, 127.7, 127.0, 125.2, 119.9, 86.7, 85.7, 84.0, 83.4, 73.9, 67.6, 57.8, 47.0, 27.8, 22.7, 22.4, 22.2; HRMS (FAB) *m/z* (M+H)<sup>+</sup> calcd for [C<sub>31</sub>H<sub>37</sub>NO<sub>8</sub>+H]<sup>+</sup> 552.2592, found 552.2598.

***tert*-Butyl 2-((((9H-fluoren-9-yl)methoxy)carbonyl)amino)-2-(2-isopropoxy-3,4-dioxocyclobut-1-en-1-yl) acetate (8)**

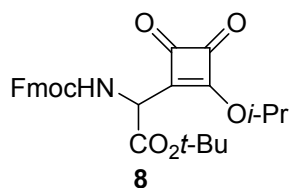

To a solution of **7** (702 mg, 1.27 mmol) in CH<sub>2</sub>Cl<sub>2</sub> (10 mL) was added 12*N* HCl (0.083 mL) at room temperature. The mixture was stirred for 3 h, quenched with NaHCO<sub>3</sub>, and filtrated through a celite pad. The filtrate was concentrated *in vacuo*. The residue was purified by flash column chromatography on silica gel (*n*-hexane/EtOAc = 10/1-1/1) to give **8** (499 mg, 80%) as yellow oil:

FTIR (neat) 3345, 2983, 2937, 1799, 1727, 1596, 1511, 1450, 1390, 1322, 1249, 1151, 1095, 1052 cm<sup>-1</sup>;

<sup>1</sup>H NMR (300 MHz, CDCl<sub>3</sub>) δ 7.76 (d, *J* = 7.2 Hz, 2H), 7.61 (d, *J* = 7.2 Hz, 2H), 7.40 (t, *J* = 7.2 Hz, 2H), 7.31 (t, *J* = 7.2 Hz, 2H), 6.06 (d, *J* = 7.2 Hz, 1H), 5.52-4.40 (m, 2H), 4.37-4.31 (m, 2H), 4.25 (t, *J* = 7.2 Hz, 1H), 1.48 (s, 9H), 1.46-1.42 (m, 6H);

<sup>13</sup>C NMR (75 MHz, CDCl<sub>3</sub>) δ 196.5, 193.5, 191.4, 174.5, 165.1, 155.4, 143.6, 141.2, 127.7, 127.1, 125.1, 119.9, 84.7, 80.3, 67.6, 51.4, 46.9, 27.8, 22.7, 22.6;

HRMS (FAB) *m/z* (M+H)<sup>+</sup> calcd for [C<sub>28</sub>H<sub>29</sub>NO<sub>7</sub>+H]<sup>+</sup> 492.2017, found 492.2014.

**(9H-Fluoren-9-yl)methyl ((2-isopropoxy-3,4-dioxocyclobut-1-en-1-yl)methyl)carbamate (9)**  
**[FmocHN-[Sq-Gly]-O*i*-Pr]**

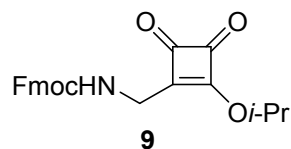

To a solution of **8** (290 mg, 0.589 mmol) in CH<sub>2</sub>Cl<sub>2</sub> (6 mL) was added TFA (1.4 mL) at 0 °C. The mixture was stirred for 10 min at 0 °C, warmed to room temperature, and stirred for 12 h. The mixture was quenched with sat. NaHCO<sub>3</sub> (10 mL) and extracted with EtOAc (5 mL x 3). The combined organic layers were washed with brine (10 mL), dried over MgSO<sub>4</sub>, and filtered. The filtrate was concentrated *in vacuo*. The residue was purified by flash column chromatography on silica gel (*n*-hexane/EtOAc = 10/1-1/1) to give **9** (175 mg, 76%) as yellow oil:

FTIR (neat) 3347, 3066, 3018, 2985, 2938, 1795, 1751, 1714, 1590, 1517, 1450, 1400, 1324, 1243, 1143, 1093, 1049, 1004, cm<sup>-1</sup>;

<sup>1</sup>H NMR (300 MHz, CDCl<sub>3</sub>) δ 7.76 (d, *J* = 7.5 Hz, 2H), 7.59 (d, *J* = 7.5 Hz, 2H), 7.40 (t, *J* = 7.5 Hz, 2H), 7.31 (t, *J* = 7.5 Hz, 2H), 5.46 (br s, 1H), 5.39 (sept, *J* = 6.3 Hz, 1H), 4.52-4.39 (m, 4H), 4.23 (t, *J* = 6.6 Hz, 1H), 1.43 (d, *J* = 6.3 Hz, 6H);

<sup>13</sup>C NMR (75 MHz, CDCl<sub>3</sub>) δ 196.7, 193.3, 193.0, 177.7, 156.2, 143.6, 141.2, 127.7, 127.0, 125.0, 119.9, 80.0, 67.2, 47.0, 36.5, 22.6;

HRMS (FAB) *m/z* (M+H)<sup>+</sup> calcd for [C<sub>23</sub>H<sub>21</sub>NO<sub>5</sub>+H]<sup>+</sup> 392.1492, found 392.1488.

**FmocHN-[Sq-Gly]-(L)-Phe-OBn (10)**

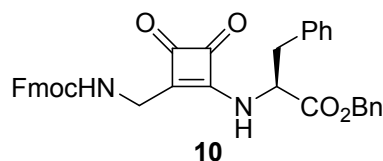

To a solution of **9** (25.0 mg, 0.064 mmol) in THF (0.5 mL) was added a solution of H<sub>2</sub>N-(L)-Phe-OBn (49.0 mg, 0.192 mmol) in THF (0.5 mL) at room temperature. The mixture was stirred for 3 h and washed with 4*N* HCl (3 mL). The organic layer was washed with sat.NaHCO<sub>3</sub> (5 mL) and brine (5 mL), dried over MgSO<sub>4</sub>, and filtered. The filtrate was concentrated *in vacuo*. The residue was purified by flash column chromatography on silica gel (*n*-hexane/EtOAc = 10/1-1/1) to give **10** (27.0 mg, 71%) as pale yellow amorphous solid:

$[\alpha]^{24.8}_{\text{D}} -4.0^{\circ}$  (*c* 0.95, CHCl<sub>3</sub>);

FTIR (neat) 3318, 3029, 2952, 1787, 1739, 1700, 1606, 1517, 1450, 1334, 1251, 1216, 1178, 1106, 1079, 1052, 1002 cm<sup>-1</sup>;

<sup>1</sup>H NMR (300 MHz, CDCl<sub>3</sub>) δ 7.91 (d, *J* = 8.7 Hz, 1H), 7.78 (d, *J* = 7.2 Hz, 2H), 7.57 (t, *J* = 7.2 Hz, 2H), 7.41 (t, *J* = 7.2 Hz, 2H), 7.35-7.00 (m, 12H), 5.89 (br s, 1H), 5.22- 5.12 (m, 3H), 4.42 (dd, *J* = 9.6, 6.0 Hz, 1H), 4.28-4.15 (m, 2H), 4.12 (d, *J* = 6.0 Hz, 2H), 3.23 (dd, *J* = 13.8, 5.4 Hz, 1H), 3.05 (dd, *J* = 13.8, 78.1 Hz, 1H);

<sup>13</sup>C NMR (75 MHz, CDCl<sub>3</sub>) δ 192.7, 190.0, 183.8, 169.9, 166.3, 158.3, 143.6, 143.4, 141.2, 134.6, 134.4, 129.3, 128.6, 128.4, 127.8, 127.3, 127.0, 125.1, 124.9, 120.0, 67.7, 67.6, 57.5, 46.8, 39.7, 33.3;

HRMS (FAB) *m/z* (M+H)<sup>+</sup>calcd for [C<sub>36</sub>H<sub>30</sub>N<sub>2</sub>O<sub>6</sub>+H]<sup>+</sup> 587.2177, found 587.2177.

***tert*-Butyl 2-(2-(2-(((9H-fluoren-9-yl)methoxy)carbonyl)amino)-2-oxoethyl)hydrazinyl)- 2-(1-hydroxy-2,3-diisopropoxy-4-oxocyclobut-2-en-1-yl)acetate (**14**)**

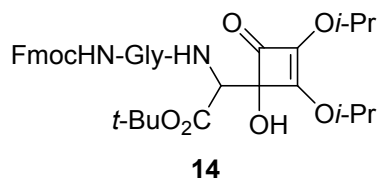

To a solution of **5** (12.4 g, 26.8 mmol) in MeOH (55 mL) was added 10% Pd-C (2.48 g) at room temperature. The mixture was stirred under H<sub>2</sub> for 3 h at room temperature and filtrated through a celite pad. The filtrate was concentrated *in vacuo* to give **6** (9.0 g). The amine **6** was subjected to the next step without purification. FmocHN-Gly-OH (8.1 g, 27.3 mmol), EDCI (5.26 g, 27.4 mmol) was successively added to a solution of **6** (9.0 g) in THF (78 ml) at 0 °C. The mixture was stirred for 10 min at 0 °C, warmed to room temperature, and stirred for 3 h. The mixture was quenched with sat. NH<sub>4</sub>Cl and extracted with EtOAc (20 mL x 3). The combined organic layers were washed with brine, dried over MgSO<sub>4</sub>, and filtered. The filtrate was concentrated *in vacuo*. The residue was purified by flash column chromatography on silica gel (*n*-hexane/EtOAc = 5/1-1/3) to give **14** (16.0 g, 98% (2 steps from **5**), an inseparable 2:1 mixture of diastereomers) as yellow amorphous solid:

FTIR (neat) 3338, 2981, 2937, 1769, 1727, 1615, 1520, 1450, 1386, 1373, 1320, 1249, 1157, 1097, 1048, 997, 960, 938, 909, 843, 759, 735 cm<sup>-1</sup>;

<sup>1</sup>H NMR (300 MHz, CDCl<sub>3</sub>) δ 7.72 (d, *J* = 7.4 Hz, 2H), 7.59 (br d, 2H, *J* = 7.4 Hz), 7.36 (t, *J* = 7.4 Hz, 2H), 7.27 (t, *J* = 7.4 Hz, 2H), 7.19 (br s, 1H), 6.10 (br s, 2/3H), 6.00 (br s, 1/3H), 5.02 (d, *J* = 8.7 Hz, 2/3H), 4.95 (d, *J* = 8.1 Hz, 1/3H), 4.91-4.75 (m, 2H), 4.35 (d, *J* = 7.2 Hz, 2H), 4.22 (t, *J* = 7.2 Hz, 1H), 4.12-3.91 (m, 2H), 1.51-1.15 (m, 21H);

<sup>13</sup>C NMR (75 MHz, CDCl<sub>3</sub>) δ 182.8, 182.3, 170.0, 169.7, 167.6, 167.5, 164.7, 164.6, 156.7, 156.5, 143.8, 143.7, 141.1, 132.2, 127.5, 127.0, 125.1, 119.7, 85.5, 85.4, 83.2, 83.1, 77.5, 67.3, 56.9, 56.4, 46.9, 44.3, 27.7, 22.6, 22.4, 22.1;

HRMS (FAB) *m/z* (M+H)<sup>+</sup> calcd for [C<sub>33</sub>H<sub>40</sub>N<sub>2</sub>O<sub>9</sub>+H]<sup>+</sup> 609.2807, found 609.2823.

***tert*-Butyl 2-(2-((((9H-fluoren-9-yl)methoxy)carbonyl)amino)acetamido)-2-(2-isopropoxy-3,4-dioxocyclobut-1-en-1-yl)acetate (**15**)**

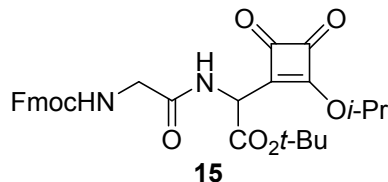

To a solution of **14** (1.40 g, 2.30 mmol) in CH<sub>2</sub>Cl<sub>2</sub> (22 mL) was added 12 *N* HCl (0.18 mL) at room temperature. The mixture was stirred for 3 h, quenched with NaHCO<sub>3</sub>, and filtrated through a celite pad. The filtrate was concentrated *in vacuo*. The residue was purified by flash column chromatography on silica gel (*n*-hexane/EtOAc = 5/1-1/3) to give **15** (876 mg, 70%) as yellow amorphous solid:

FTIR (neat) 3342, 2981, 1797, 1733, 1682, 1594, 1519, 1450, 1392, 1326, 1251, 1150, 1093, 1047, 910, 761, 734 cm<sup>-1</sup>;

<sup>1</sup>H NMR (300 MHz, CDCl<sub>3</sub>) δ 7.76 (d, *J* = 7.5 Hz, 2H), 7.60 (d, *J* = 7.5 Hz, 2H), 7.40 (t, *J* = 7.5 Hz, 2H), 7.31 (t, *J* = 7.5 Hz, 2H), 7.22 (br s, 1H), 5.58 (d, *J* = 6.9 Hz, 1H), 5.53 (br s, 1H), 5.46 (sept, *J* = 6.0 Hz, 1H), 4.43 (d, *J* = 6.6 Hz, 2H), 4.24 (t, *J* = 6.6 Hz, 1H), 4.00 (br s, 1H), 1.49-1.44 (m, 15H);

<sup>13</sup>C NMR (75 MHz, CDCl<sub>3</sub>) δ 196.5, 193.3, 191.6, 173.7, 169.2, 164.7, 156.5, 143.7, 141.1, 127.5, 126.9, 125.0, 119.8, 84.6, 80.4, 67.2, 49.9, 46.9, 44.0, 27.7, 22.6, 22.5;

HRMS (FAB) *m/z* (M+H)<sup>+</sup> calcd for [C<sub>30</sub>H<sub>32</sub>N<sub>2</sub>O<sub>8</sub>+H]<sup>+</sup> 549.2231, found 549.2234.

**FmocHN-Gly-[Sq-Gly]-Oi-Pr (16)**

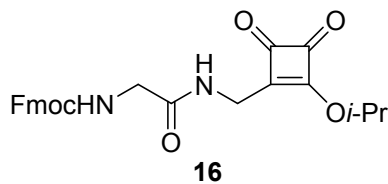

To a solution of **15** (1.40 g, 2.55 mmol) in CH<sub>2</sub>Cl<sub>2</sub> (26 mL) was added TFA (6 mL) at 0 °C. The mixture was stirred for 10 min at 0 °C, warmed to room temperature, and stirred for 12 h. The mixture was quenched with *sat.* NaHCO<sub>3</sub> and extracted with EtOAc (15 mL x 3). The combined organic layers were washed with brine, and dried over MgSO<sub>4</sub>, and filtered. The filtrate was concentrated *in vacuo*. The residue was purified by flash column chromatography on silica gel (*n*-hexane/EtOAc = 3/1-1/6) to give **16** (780 mg, 69%) as yellow amorphous solid:

FTIR (neat) 3628, 3338, 2987, 1796, 1748, 1670, 1587, 1449, 1404, 1322, 1251, 1201, 1136, 1093, 1049, 990, 899, 800 cm<sup>-1</sup>;

<sup>1</sup>H NMR (300 MHz, CD<sub>3</sub>OD) δ 7.77 (d, *J* = 7.5 Hz, 2H), 7.65 (d, *J* = 7.5 Hz, 2H), 7.37 (t, *J* = 7.5 Hz, 2H), 7.29 (t, *J* = 7.5 Hz, 2H), 5.33 (sept, *J* = 6.0 Hz, 1H), 4.40-4.25 (m, 4H), 4.20 (t, *J* = 6.9 Hz, 1H), 3.82 (s, 2H), 1.41 (d, *J* = 6.0 Hz, 6H);

<sup>13</sup>C NMR (100 MHz, CD<sub>3</sub>OD) δ 198.4, 195.5, 194.3, 178.9, 172.8, 158.9, 145.2, 142.6, 128.9, 128.3, 126.3, 121.1, 81.4, 68.2, 48.3, 44.9, 35.5, 23.0;

HRMS (FAB) *m/z* (M+H)<sup>+</sup> calcd for [C<sub>25</sub>H<sub>24</sub>N<sub>2</sub>O<sub>6</sub>+H]<sup>+</sup> 449.1707, found 449.1709



**FmocHN-Gly-[Sq-Gly]-(L)-Phe-OBn (17)**

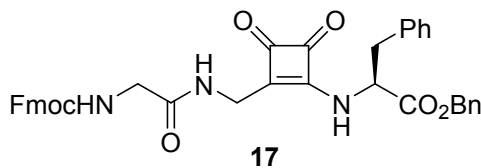

To a solution of **16** (50.7 mg, 0.113 mmol) in THF (0.5 mL) was added a solution of H<sub>2</sub>N-(L)-Phe-OBn (86 mg, 0.339 mmol) in THF (0.5 mL) at room temperature. The mixture was stirred for 3 h and quenched with 4*N* HCl (3 mL). The organic layer was washed with sat. NaHCO<sub>3</sub> and brine (15 mL), dried over MgSO<sub>4</sub>, and filtered. The filtrate was concentrated *in vacuo*. The residue was purified by flash column chromatography on silica gel (*n*-hexane/EtOAc = 10/1-1/9) to give **17** (47.0 mg, 64%) as yellow amorphous solid:

$[\alpha]^{30.0}_{\text{D}} -23.8^{\circ}$  (*c* 1.3, MeOH);

FTIR (neat) 3734, 3709, 3628, 3566, 3289, 1786, 1733, 1607, 1540, 1455, 1244, 1166 cm<sup>-1</sup>;

<sup>1</sup>H NMR (300 MHz, CDCl<sub>3</sub>)  $\delta$  7.97 (d, *J* = 8.4 Hz, 1H), 7.74 (d, *J* = 7.2 Hz, 2H), 7.57 (d, *J* = 7.2 Hz, 2H), 7.41-7.00 (m, 15H), 5.68 (br s, 1H), 5.19-5.10 (m, 3H), 4.45 (d, *J* = 6.3 Hz, 2H), 4.19 (t, *J* = 6.3 Hz, 1H), 4.12 (br s, 2H), 3.78 (br d, 2H), 3.25 (dd, *J* = 13.8, 5.1 Hz, 1H), 3.07 (dd, *J* = 13.8, 8.4 Hz, 1H);

<sup>13</sup>C NMR (75 MHz, CDCl<sub>3</sub>)  $\delta$  192.4, 190.1, 183.7, 171.8, 170.0, 166.0, 156.7, 143.7, 143.6, 141.3, 134.8, 134.7, 129.4, 128.6, 128.5, 127.7, 127.3, 127.0, 124.9, 120.0, 67.7, 67.0, 57.8, 47.1, 44.3, 39.4, 32.5;

HRMS (FAB) *m/z* (M+H)<sup>+</sup> calcd for [C<sub>38</sub>H<sub>33</sub>N<sub>3</sub>O<sub>7</sub>+H]<sup>+</sup>, 644.2391, found 644.2398.

**AcHN-Gly-[Sq-Gly]-(L)-Phe-OBn (18)**

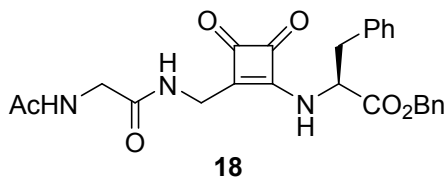

To a solution of **17** (34.0 mg, 0.053 mmol) was added 20% Et<sub>2</sub>NH/THF (1 mL) at room temperature. The mixture was stirred for 30 min and concentrated *in vacuo*. To the residue was added acetic anhydride (1 mL) at room temperature and stirred for 1 h and concentrated *in vacuo*. The residue was purified by flash column chromatography on silica gel (*n*-hexane/EtOAc = 1/1 and EtOAc/MeOH = 40/1) to give **18** (17.5 mg, 72%) as yellow oil:

$[\alpha]^{30.0}_{\text{D}} -31.9^{\circ}$  (*c* 1.36, MeOH);

FTIR (neat) 3733, 3628, 3595, 3301, 2980, 2934, 1741, 1653, 1616, 1455, 1271, 1213, 1105, 1050, 753 cm<sup>-1</sup>;

<sup>1</sup>H NMR (300 MHz, CDCl<sub>3</sub>) δ 7.96 (d, *J* = 9.0 Hz, 1H), 7.66 (t, *J* = 5.7 Hz, 1H), 7.37-7.08 (m, 10H), 6.57 (t, *J* = 5.4 Hz, 1H), 5.24-5.08 (m, 3H), 4.19 (dd, *J* = 15.9, 5.7 Hz, 1H), 4.19 (dd, *J* = 15.9, 5.7 Hz, 1H), 3.91 (dd, *J* = 16.5, 5.4 Hz, 1H), 3.82 (dd, *J* = 16.5, 5.4 Hz, 1H), 3.28 (dd, *J* = 14.1, 5.1 Hz, 1H), 3.09 (dd, *J* = 14.1, 9.0 Hz, 1H), 2.00 (s, 3H);

<sup>13</sup>C NMR (75 MHz, CDCl<sub>3</sub>) δ 192.4, 190.1, 183.7, 171.6, 171.3, 170.2, 166.1, 134.9, 134.7, 129.5, 128.7, 128.6, 128.5, 127.4, 67.8, 57.8, 43.2, 39.5, 32.6, 22.9;

HRMS (FAB) *m/z* (M-H)<sup>-</sup> calcd for [C<sub>25</sub>H<sub>25</sub>N<sub>3</sub>O<sub>6</sub>-H]<sup>-</sup>, 462.1671, found 462.1660.

**FmocHN-Gly-[Sq-Gly]-(L)-Phe-OH (19)**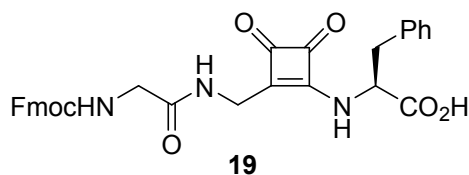

To a suspension of FmocHN-Phe-Wang resin (Watanabe Chemical Industries, Ltd., 0.67 mmol/resin(g), 68 mg, 0.046 mmol) in a small reaction tube with a membrane filter (LibraTube, HiPep Lab. Inc.) was added a solution of piperidine/DMF 1:4 (2 mL). The mixture was shaken with a vortex mixer for 1 min. The tube was equipped with a rotary shaker and mixing was continued for 15 min. The solution was removed by filtration and the resin was washed with DMF (2 mL x 3) and CH<sub>2</sub>Cl<sub>2</sub> (2 mL x 2). To a suspension of the residual resin in AcOEt (2 mL), FmocHN-Gly-[Sq-Gly]-Oi-Pr **16** (41 mg, 0.091 mmol) was added. The mixture was shaken with a vortex mixer for 1 min and subjected to mixing with a rotary shaker for 24 h. The mixture was filtrated. The residual resin was washed with DMF (2 mL x 3) and CH<sub>2</sub>Cl<sub>2</sub> (2 mL x 2). This coupling procedure was repeated once again. The residual resin was moved to a test tube and treated with TFA (3 mL) for 3 h. The mixture was filtrated and concentrated *in vacuo*. The residue was purified by flash column chromatography on silica gel (*n*-hexane/EtOAc (1% AcOH) = 2/1-0/1) to give **19** (20 mg, 80%, a 4:1 mixture of two rotamers) as white amorphous solid:

$[\alpha]^{27.5}_{\text{D}} -13.0^{\circ}$  (*c* 1.32, MeOH);

FTIR (neat) 3322, 3019, 2935, 1787, 1722, 1671, 1602, 1531, 1448, 1342, 1247, 1176, 1105, 1045, 993, 755, 701 cm<sup>-1</sup>;

<sup>1</sup>H NMR (300 MHz, CD<sub>3</sub>OD)  $\delta$  7.78 (d, *J* = 7.2 Hz, 2H), 7.65 (d, *J* = 7.2 Hz, 2H), 7.38 (t, *J* = 7.2 Hz, 2H), 7.34-7.12 (m, 7H), 5.05 (dd, *J* = 9.9, 4.2 Hz, 4/5H), 4.62 (dd, *J* = 9.6, 4.2 Hz, 1/5H), 4.40 (d, *J* = 6.9 Hz, 8/5H), 4.36 (d, *J* = 6.9 Hz, 2/5H), 4.27-3.95 (m, 3H), 3.90-3.64 (m, 2H), 3.36 (m, 1H), 3.08 (m, 1H);

<sup>13</sup>C NMR (75 MHz, CD<sub>3</sub>OD)  $\delta$  193.4, 192.9, 192.3, 184.7, 173.3, 173.2, 172.4, 166.7, 164.3, 159.3, 145.2, 145.2, 142.6, 137.8, 137.6, 130.7, 130.5, 129.7, 129.6, 128.8, 128.2, 128.1, 126.2, 120.9, 68.2, 61.0, 59.6, 48.3, 45.0, 44.8, 39.9, 39.2, 34.6, 34.3;

HRMS (FAB) *m/z* (M-H)<sup>-</sup> calcd for [C<sub>31</sub>H<sub>27</sub>N<sub>3</sub>O<sub>7</sub>-H]<sup>-</sup> 552.1776, found 552.1777.

***tert*-Butyl 2-(2-(((9H-fluoren-9-yl)methoxy)carbonyl)amino)acetamido)-2-(2-isopropoxy-3,4-dioxocyclobut-1-en-1-yl)-3-phenylpropanoate (20)**

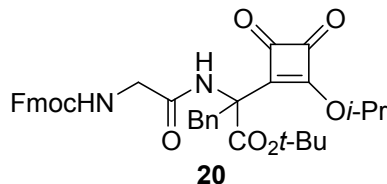

To a solution of **15** (1.70 g, 3.10 mmol) in CH<sub>2</sub>Cl<sub>2</sub> (30 mL) was added BnBr (2.95 mL, 24.8 mmol) and TBAI (9.15 g, 24.8 mmol) at room temperature. Et<sub>3</sub>N (0.517 mL, 3.72 mmol) was added to the mixture. The mixture was stirred for 20 min and filtrated through a celite pad. The filtrate was concentrated *in vacuo*. The residue was purified by flash column chromatography on silica gel (*n*-hexane/EtOAc = 10/1-1/1) to give **23** (1.75 g, 90%) as pale yellow amorphous solid:

FTIR (neat) 3387, 3010, 2982, 2936, 1794, 1758, 1734, 1680, 1591, 1496, 1450, 1389, 1371, 1343, 1330, 1250, 1220, 1150, 1095, 1047, 1006 cm<sup>-1</sup>;

<sup>1</sup>H NMR (400 MHz, CDCl<sub>3</sub>) δ 7.77 (d, *J* = 7.6 Hz, 2H), 7.59 (dd, *J* = 7.6, 4.1 Hz, 2H), 7.40 (t, *J* = 7.6 Hz, 2H), 7.30 (t, *J* = 7.6 Hz, 2H), 7.28-7.18 (m, 3H), 7.09 (d, *J* = 7.3 Hz, 2H), 6.98 (s, 1H), 5.50 (sept, *J* = 6.4 Hz, 1H), 5.40 (br s, 1H), 4.39 (m, 2H), 4.22 (t, *J* = 7.3 Hz, 1H), 3.93 (m, 2H), 3.90 (d, *J* = 13.9 Hz, 1H), 3.63 (d, *J* = 13.9 Hz, 1H), 1.50-1.44 (m, 12H), 1.43 (d, *J* = 6.4 Hz, 3H);

<sup>13</sup>C NMR (100 MHz, CDCl<sub>3</sub>) δ 195.7, 193.6, 191.1, 178.0, 168.3, 166.3, 156.3, 143.7, 141.2, 133.9, 130.0, 128.4, 127.7, 127.6, 127.0, 125.1, 119.9, 85.3, 80.3, 67.3, 63.3, 47.0, 44.3, 37.8, 27.8, 22.8, 22.7;

HRMS (FAB) *m/z* (M-H)<sup>-</sup>calcd for [C<sub>37</sub>H<sub>38</sub>N<sub>2</sub>O<sub>8</sub>-H]<sup>-</sup> 637.2555, found 637.2565.

## Solid phase synthesis of [Sq-Phe<sup>4</sup>] Enkephalin **21**

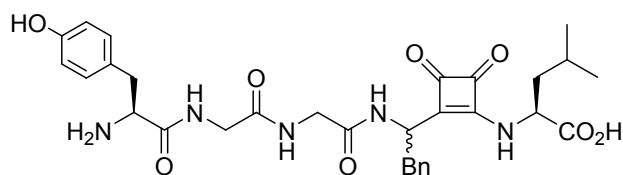

**21**

To a suspension of FmocHN-Leu-Wang resin (Watanabe Chemical Industries, Ltd., 0.60 mmol/resin(g), 167 mg, 0.10 mmol) in a reaction tube with a membrane filter (LibraTube, HiPep Lab. Inc.) was added a solution of piperidine/DMF 1:4 (2 mL). The reaction tube was vigorously shaken by a vortex mixer for 1 min and equipped with a rotary shaker. After mixing for 15 min, the mixture was filtrated. The residual resin was washed with DMF (2 mL x 3) and CH<sub>2</sub>Cl<sub>2</sub> (2 mL x 2). FmocHN-Gly-[Sq-Phe(CO<sub>2</sub>*t*-Bu)]-O*i*-Pr (**20**) (255 mg, 0.40 mmol) and DIEA (35  $\mu$ L, 0.20 mmol) was added to a suspension of the residual resin in AcOEt (2 mL). The reaction tube was vigorously shaken with a vortex mixer for 1 min and equipped with a rotary shaker. After mixing for 60 h, the mixture was filtrated and washed with DMF (2 mL x 3) and CH<sub>2</sub>Cl<sub>2</sub> (2 mL x 2). The subsequent removal of the Fmoc group was carried out using Et<sub>2</sub>NH/DMF 1:4 (2 mL) (In the case of using piperidine/DMF, a byproduct which piperidine added to carbonyl group of  $\alpha$ -Asq in desired peptide observed by MALDI-TOF MS analysis after cleavage reaction from the resin.). FmocHN-Gly-OH, HBTU, HOBt, and DIEA (0.4 mmol, 0.36 mmol, 0.4 mmol, and 0.8 mmol) were added to a suspension of the residual resin in DMF (2 mL). The reaction tube was shaken with a vortex mixer for 2 min and equipped with a rotary shaker. After mixing for 1.5 h, the mixture was filtrated. The residual resin was washed with DMF (2 mL x 3) and CH<sub>2</sub>Cl<sub>2</sub> (2 mL x 2). According to the methods described above, the subsequent removal of the Fmoc group using Et<sub>2</sub>NH/DMF 1:4 (2 mL) and coupling reaction of Fmoc-Tyr(*t*-Bu)-OH were carried out. After the removal of the Fmoc group, the residual resin was moved to a test tube and treated with TFA (3 mL) for 3 h. The mixture was filtrated and concentrated *in vacuo*. The crude mixture (36 mg) was purified by flash column chromatography on Cosmosil<sup>®</sup> (H<sub>2</sub>O/MeOH = 2/1-1/1) and reverse-phase HPLC (Column : Nacalai Cosmosil 5C<sub>18</sub>-MS-II, Column Size : 20 x 250 mm, solvent 33% MeCN (0.1% TFA)/H<sub>2</sub>O (0.1% TFA), flow rate 6 mL/min, temperature : 25  $^{\circ}$ C, UV detection at 254 nm, sample conc : 36 mg/mL, injection volume 90  $\mu$ L) to give **21a** (7.5 mg ; retention time at 17.5 min) and **21b** (10 mg ; retention time at 20.9 min) as pale yellow sticky oil, respectively: HPLC profile is shown in the next page. NMR signals are multiple and broaden because of the presence of rotamers arising from the N-Sq bond (see attached spectral data of <sup>1</sup>H- and <sup>13</sup>C-NMR (300 MHz, CD<sub>3</sub>OD) of **21a** and **21b** in SI).

### **21a**

$[\alpha]_{D}^{21.9} +9.7^{\circ}$  (*c* 0.65, MeOH);

FTIR (neat) 2959, 1785, 1733, 1678, 1604, 1519, 1430, 1253, 1202, 1142, 1027 cm<sup>-1</sup>;

HRMS (ESI) *m/z* (M+H)<sup>+</sup>calcd for [C<sub>31</sub>H<sub>37</sub>N<sub>5</sub>O<sub>8</sub>+H]<sup>+</sup> 608.2715, found 608.2714.

HRMS (ESI) *m/z* (M+Na)<sup>+</sup>calcd for [C<sub>31</sub>H<sub>37</sub>N<sub>5</sub>O<sub>8</sub>+Na]<sup>+</sup> 630.2534, found 630.2534.

## 21b

$[\alpha]^{22.4}_D +0.35^\circ$  (*c* 0.69, MeOH);

FTIR (neat) 2969, 1785, 1734, 1675, 1604, 1517, 1457, 1364, 1231, 1203, 1142, 1029  $\text{cm}^{-1}$ ;

HRMS (ESI)  $m/z$  (M+H)<sup>+</sup>calcd for  $[\text{C}_{31}\text{H}_{37}\text{N}_5\text{O}_8+\text{H}]^+$  608.2715, found 608.2715.

HRMS (ESI)  $m/z$  (M+Na)<sup>+</sup>calcd for  $[\text{C}_{31}\text{H}_{37}\text{N}_5\text{O}_8+\text{Na}]^+$  630.2534, found 630.2533.

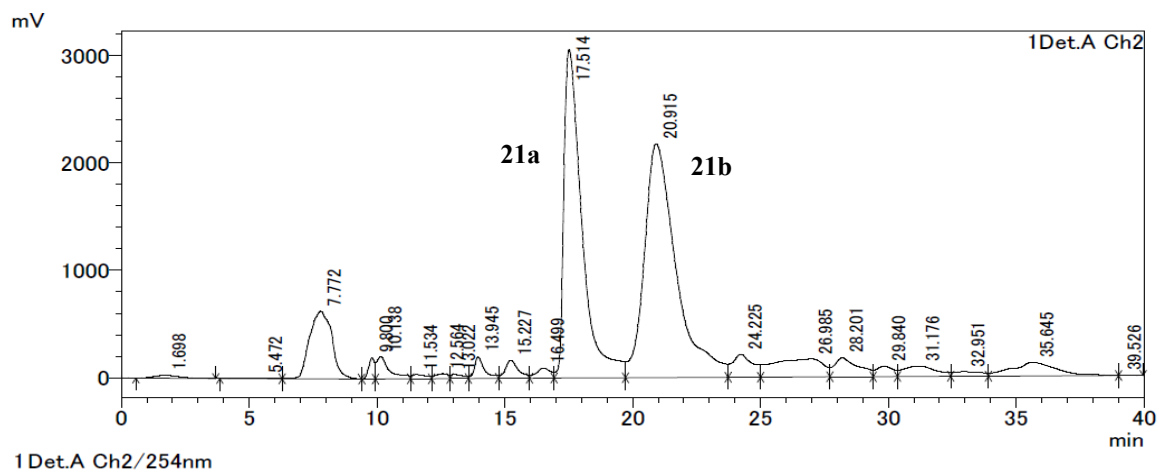

Chemical structures of compounds 22, 23, and 24 are shown below:

**22**: NCC(CCCNC(=O)NCC1C(=O)C(=O)N1C2=CC=CC=C2O)C3=CC=CC=C3

**23**: NCC(CCCNC(=O)NCC1C(=O)C(=O)N1C2=CC=CC=C2O)C3=CC=CC=C3

**24**: NCC(CCCNC(=O)NCC1C(=O)C(=O)N1C2=CC=CC=C2O)C3=CC=CC=C3

**24:** (a), (d), (a), (d), (a), (b), (c), (d), (c), (e)

15

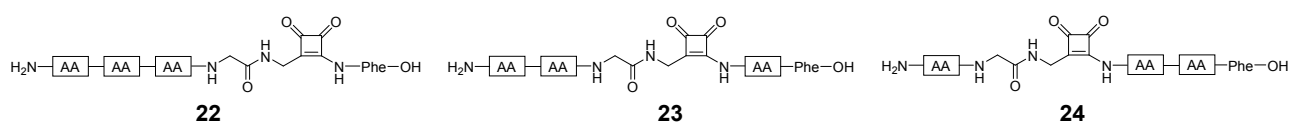

Matrix:  $\alpha$ -CHCA, Negative mode

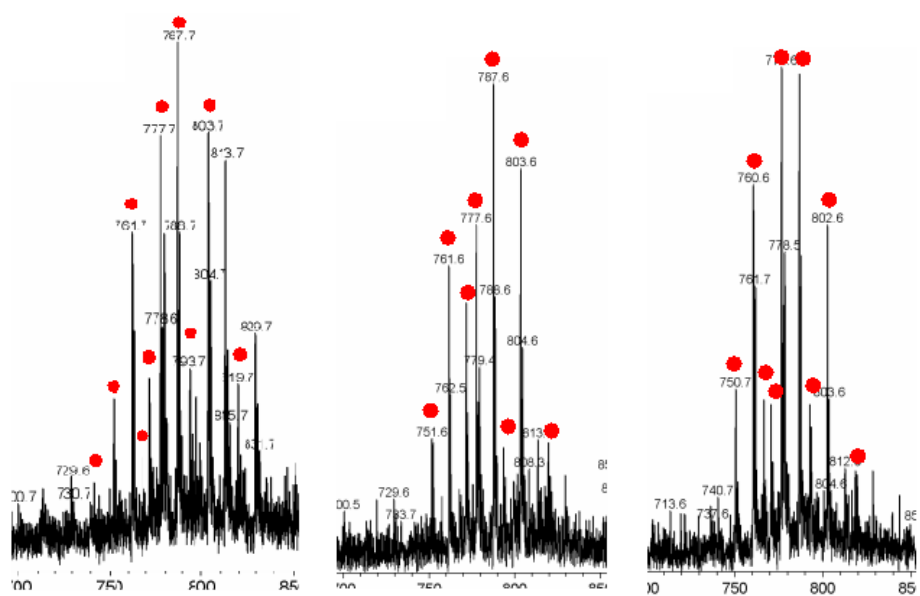

**SI-Figure 1.** MALDI-TOF MS Analysis of Peptide Library 22-24.



## Solid phase synthesis of peptide libraries 25-27

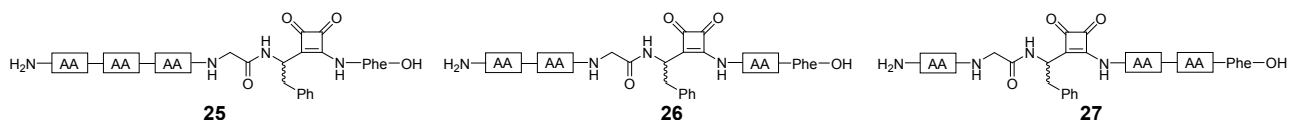

Coupling reactions were performed by a series of sequential transformations.

**25:** (a), (b), (c), (d), (c), (d), (c), (d), (c), (e)

**26:** (a), (d), (a), (b), (c), (d), (c), (d), (c), (e)

**27:** (a), (d), (a), (d), (a), (b), (c), (d), (c), (e)

The solid phase synthesis of libraries **25-27** was performed in a small reaction tube with a membrane filter (LibraTube, HiPep Lab. Inc.) using FmocHN-Phe-Wang resin (Watanabe Chemical Industries, Ltd., 0.67 mmol/resin(g), 150 mg, 0.10 mmol).

### (a) Removal of the Fmoc group from peptides not containing the $\alpha$ -Asq

The resin was treated with piperidine/DMF 1:4 (2 mL). The reaction tube was shaken by a vortex mixer for 1 min and equipped with a rotary shaker. After mixing for 15 min. the mixture was filtrated. The residual resin was washed with DMF (2 mL x 5) and CH<sub>2</sub>Cl<sub>2</sub> (2 mL x 2).

### (b) Linkage of dipeptide unit **20**

To a suspension of the NH<sub>2</sub> group-free peptide linked to the resin in AcOEt (2 mL) were added **20** (116 mg, 0.40 mmol) and DIEA (35  $\mu$ L, 0.20 mmol). The reaction tube was shaken by a vortex mixer for 1 min and equipped with a rotary shaker. After mixing for 60 h, the mixture was filtered. The residual resin was washed with DMF (2 mL x 3) and CH<sub>2</sub>Cl<sub>2</sub> (2 mL x 2).

### (c) Removal of the Fmoc group from peptides containing the $\alpha$ -Asq

The resin was treated with Et<sub>2</sub>NH/DMF 1:4 (2 mL). The reaction tube was shaken by a vortex mixer for 1 min and equipped with a rotary shaker. After mixing for 15 min, the mixture was filtrated. The residual resin was washed with DMF (2 mL x 3) and CH<sub>2</sub>Cl<sub>2</sub> (2 mL x 2).

### (d) Coupling reaction of Fmoc-amino acids

To a suspension of the residual resin in DMF (2 mL) were added a mixture of amino acids [FmocHN-Phe-OH/FmocHN-Tyr(*t*-Bu)-OH/FmocHN-His(Trt)-OH (1.33 mmol each)], HBTU (3.6 mmol), HOBt (4 mmol), and DIEA (8 mmol). The reaction tube was shaken by a vortex mixer for 1 min and equipped with a rotary shaker. After mixing for 1.5 h, the mixture was filtrated. The residual resin was washed with DMF (2 mL x 3) and CH<sub>2</sub>Cl<sub>2</sub> (2 mL x 2).

### (e) Cleavage of the peptide from resin

The residual resin was moved to a test tube and treated with TFA/H<sub>2</sub>O 19:1 (3 mL) for 3 h. The filtrate was concentrated *in vacuo* to give a crude mixture (ca. 105 mg). MALDI-TOF MS data of the crude mixtures were depicted in SI-Figure 2.

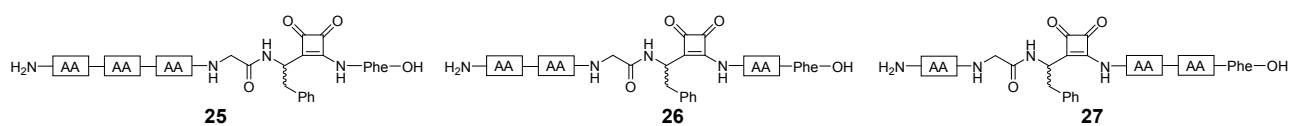

Matrix:  $\alpha$ -CHCA, Positive mode

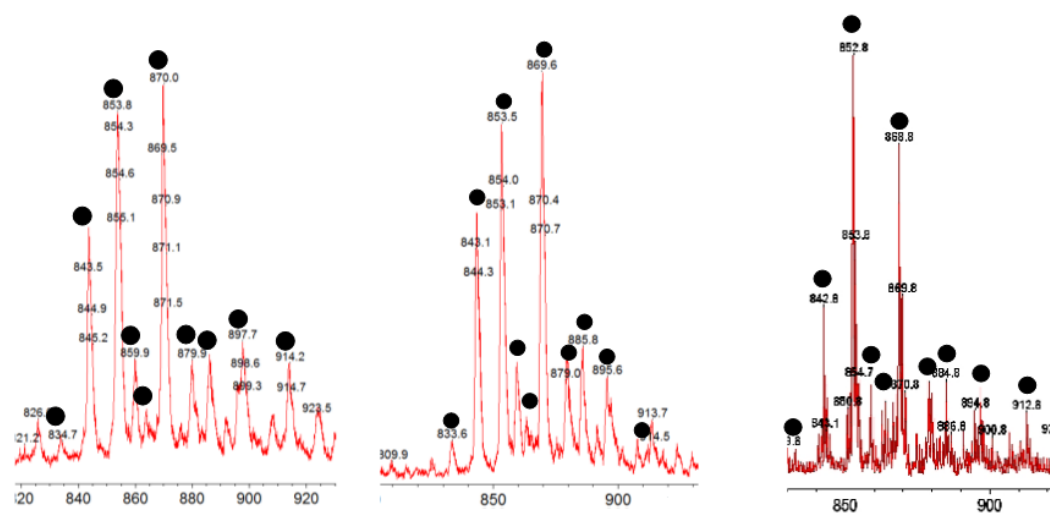

**SI-Figure 2.** MALDI-TOF MS data of Peptide library **25-27**. Matrix:  $\alpha$ -CHCA, Positive mode.

### Solid phase synthesis of 28

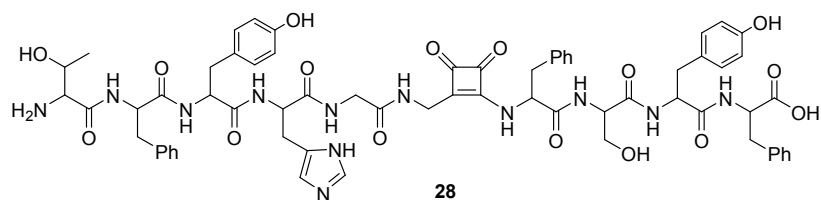

In according to the method for the solid phase synthesis of peptide libraries **20-22**, the model peptide **28** was prepared starting from the resin (0.05 mmol) by the following coupling sequence.

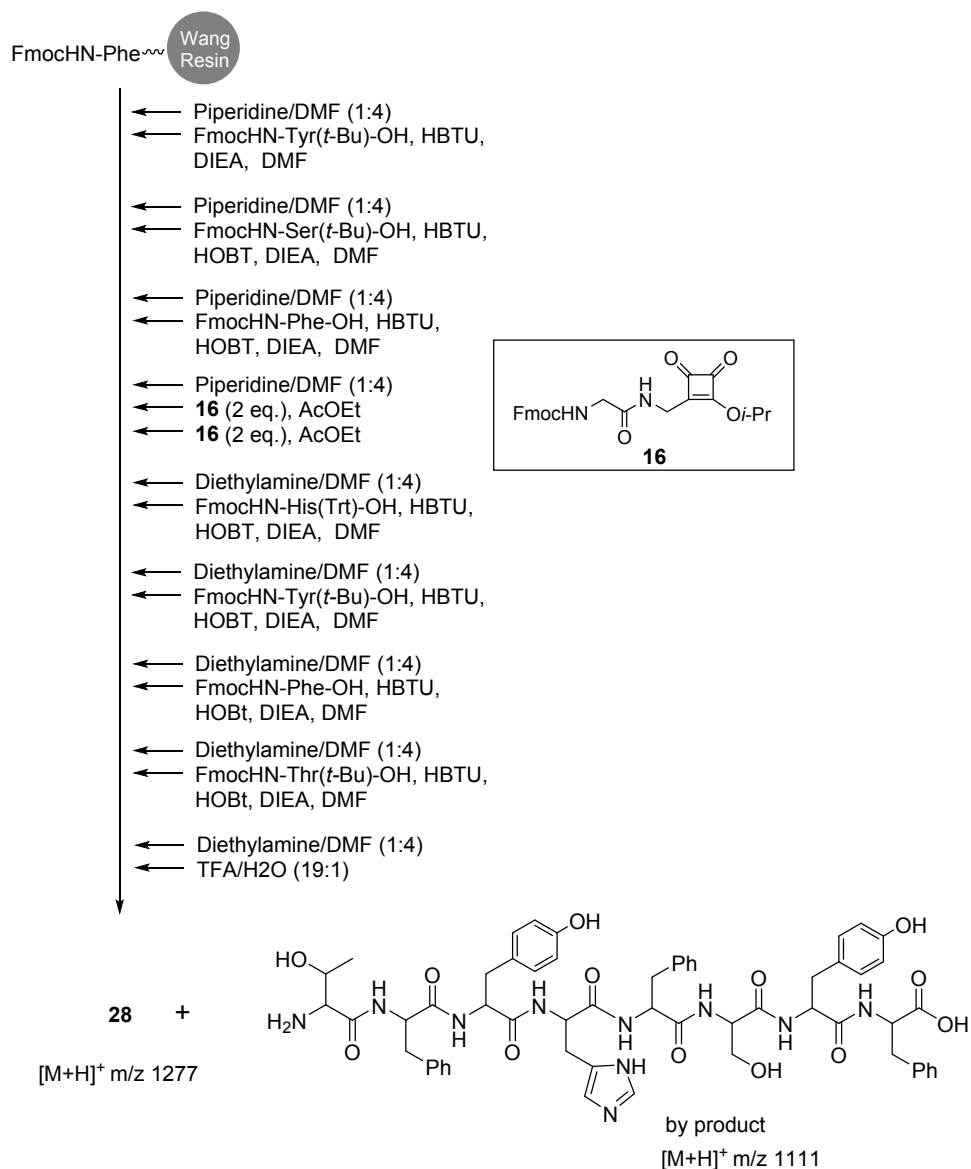

## HPLC purification of the resulting peptide mixture

10  $\mu$ L of a solution of the crude peptide in H<sub>2</sub>O (24 mg/mL) was subjected to reverse phase HPLC several times [column: Nacalai Cosmosil Packed Column Cholest, Column Size : 4.6 x 250 mm, solvent: 25% MeCN (0.1% TFA)/H<sub>2</sub>O (0.1% TFA), flow rate: 1 mL/min, UV detection at 254 nm, retention time: **28** for 26.5 min, by product for 29.5 min). After lyophilization, peptide analog **28** (< 0.1 mg) was obtained. The purity was confirmed by the MALDI-TOF MS analysis (Figure 2 (a) in the text).

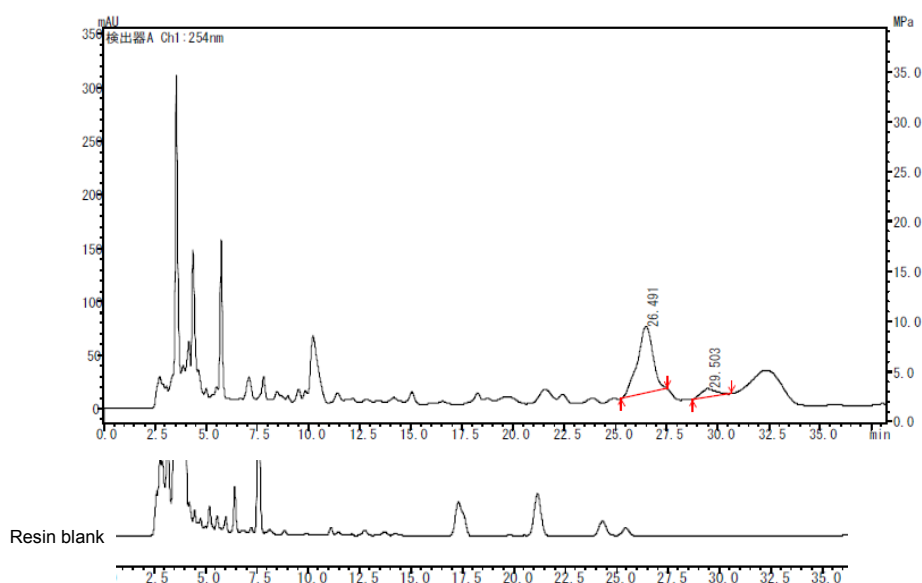

## Reaction of **28** with carboxypeptidase Y

Peptide **28** purified by the HPLC purification described above was dissolved in water (15  $\mu$ L). A buffer solution of carboxypeptidase Y (5  $\mu$ L, 2.5 mM / 50 mM ammonium bicarbonate) was added to a solution 5  $\mu$ L of peptide solution in an eppendorf-tube. The reaction mixture was incubated at 30 °C for 30 min. The time course of the reaction was monitored by MALDI-TOF/MS (see Figure 4. in the text)

## Growth inhibitory effects of HepG2 Cell

According to the modified method of a previous paper (Yang et al., 2007), the cultures of rat hepatoma cells (dRLh84) were maintained at 37 °C in humidified atmosphere containing 5% CO<sub>2</sub>. Exponentially growing cells were trypsinized, seeded at an appropriate density and incubated for 24 h to allow adhesion and growth. Trypsinized cells were suspended in the culture medium at a density of 5 x 10<sup>4</sup> cells/mL and 100 µL of the suspension was dispensed into each well of a 96-well microtiter plate. In a 24 h pre-incubation, DMSO used as a control or peptides for assays were added to culture medium of cells. After subsequent 48 h incubation, cells were trypsinized and determined by means of counting in Burker-Turk hemacytometer. Results were expressed as means±S.E. of three independent experiments.

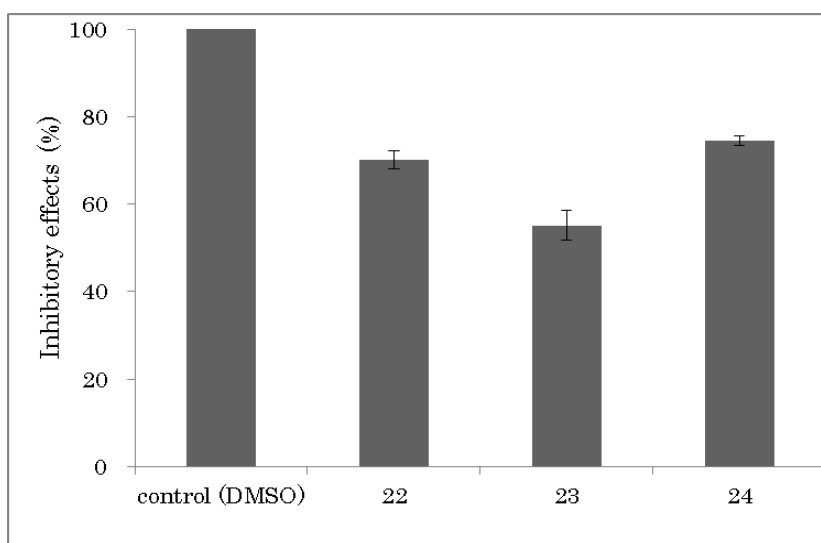

P. Yang, S. Abe, Y. Sato, T. Yamashita, F. Mtsuda, T. Hamayasu, K. Imai and K. Suzuki (2007) A palmitoyl conjugate of an insect pentapeptide causes growth arrest in mammalian cells and mimics the action of diapause hormone. *J. Insect Biotech. Sericol.* **76**, 63-69.

**$^1\text{H}$ - and  $^{13}\text{C}$ -NMR data of new compounds.**

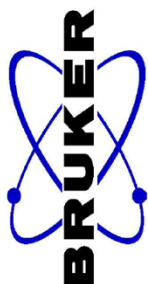

Current Data Parameters  
 NAME MK-FmocGly-HCB-H1  
 EXPNO 10  
 PROCNO 1

F2 - Acquisition Parameters  
 Date\_ 20140720  
 Time 0.35  
 INSTRUM av300  
 PROBHD 5 mm FAPBO BB-  
 PULPROG zg30  
 TD 65536  
 SOLVENT CDCl3  
 NS 16  
 DS 2  
 SMH 6188.119 Hz  
 FIDRES 0.094423 Hz  
 AQ 5.2953587 sec  
 RG 32  
 DM 80.800 usec  
 DE 6.50 usec  
 TE 295.4 K  
 D1 1.0000000 sec

===== CHANNEL f1 =====  
 NUC1 1H  
 P1 15.00 usec  
 PLW1 7.5000000 W  
 SF01 300.1318534 MHz

F2 - Processing parameters  
 SI 32768  
 SF 300.1300070 MHz  
 WDW EM  
 SSB 0  
 LB 0.30 Hz  
 GB 0  
 PC 1.00

1.510  
1.493  
1.394  
1.375  
1.338  
1.313  
1.292  
1.266  
1.244

5.848  
5.822  
5.694  
5.669  
4.911  
4.888  
4.867  
4.846  
4.735  
4.705  
4.382  
4.358  
4.258  
4.235  
4.212

7.764  
7.739  
7.621  
7.597  
7.414  
7.389  
7.365  
7.325  
7.301  
7.277

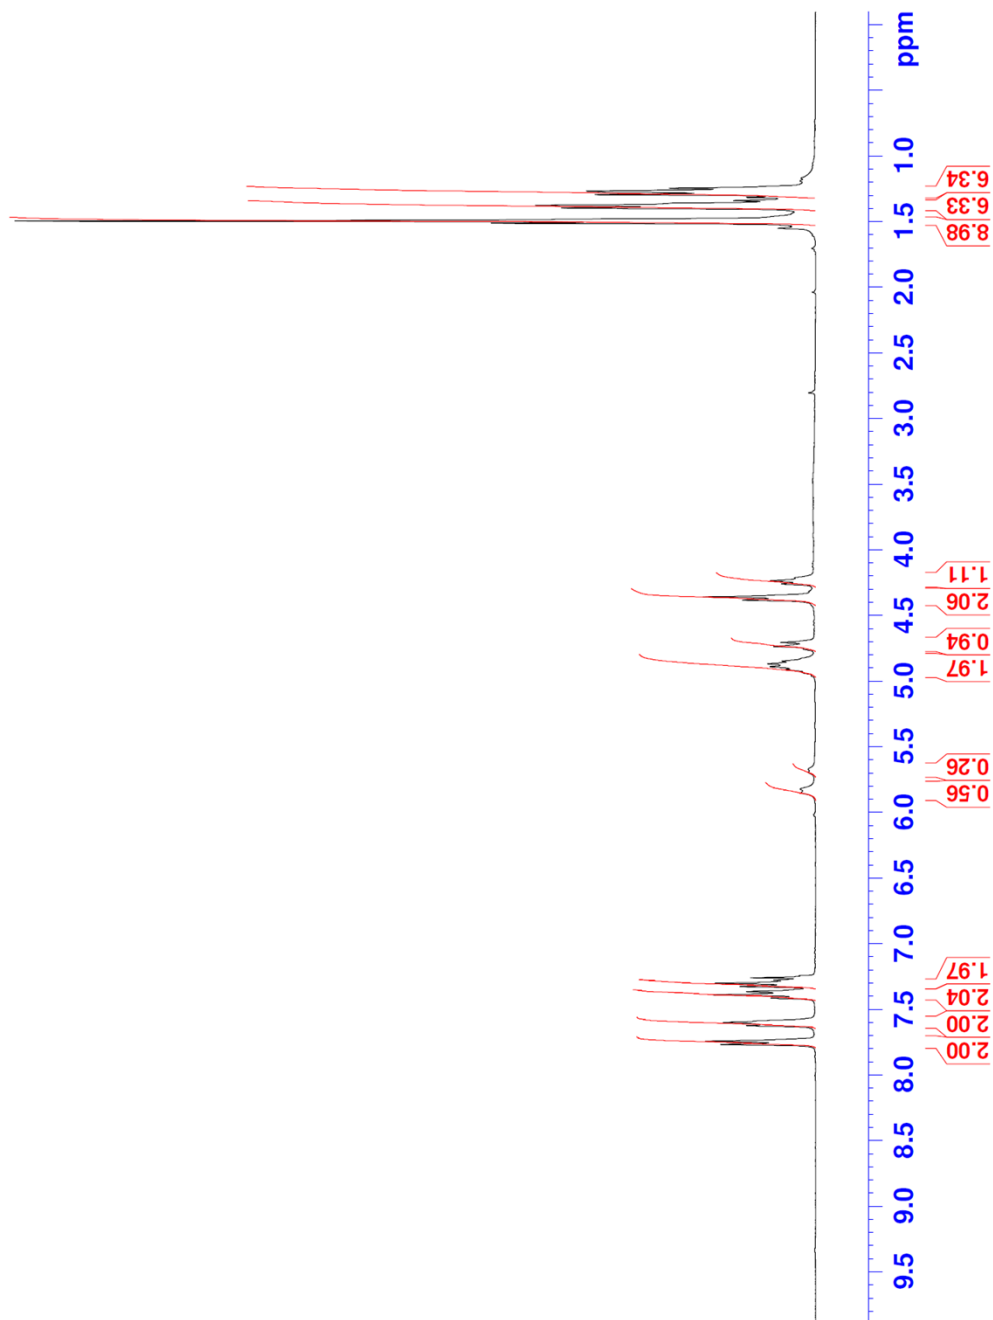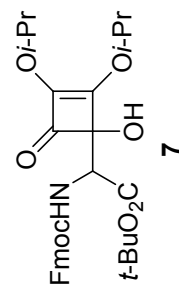

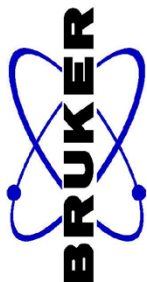

Current Data Parameters  
 NAME MK-FmocGly-HCB-C13  
 EXPNO 10  
 PROCNO 1

F2 - Acquisition Parameters  
 Date\_ 20140720  
 Time 1.53  
 INSTRUM av300  
 PROBD 5 mm PABBO BB-  
 PULPROG zgpg30  
 TD 65536  
 SOLVENT CDCl3  
 NS 1200  
 DS 2  
 SWH 18028.846 Hz  
 FIDRES 0.275098 Hz  
 AQ 1.8175818 sec  
 RG 203  
 DW 27.733 usec  
 DE 6.50 usec  
 TE 296.3 K  
 D1 2.00000000 sec  
 D11 0.03000000 sec

===== CHANNEL f1 =====  
 NUC1 13C  
 P1 10.00 usec  
 PLW1 32.0000000 W  
 SFO1 75.4752953 MHz  
 ===== CHANNEL f2 =====  
 CPDPRG2 waltz16  
 NUC2 1H  
 P1 90.00 usec  
 PLW2 7.80000019 W  
 PLW12 0.21667001 W  
 PLW13 0.17550001 W  
 SFO2 300.1312005 MHz

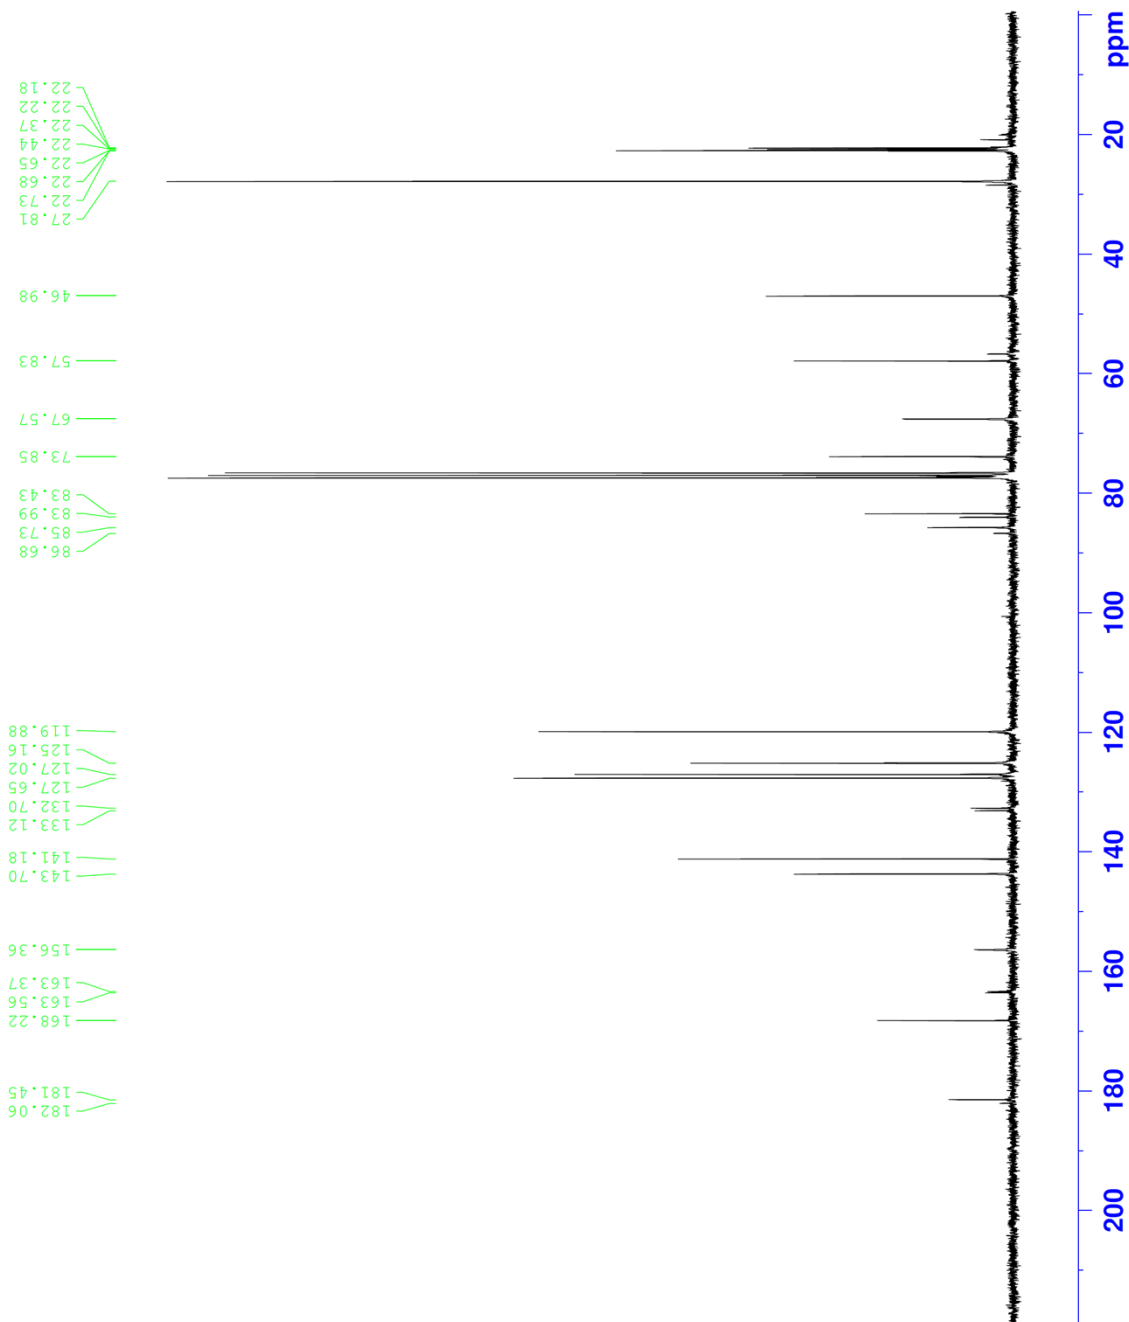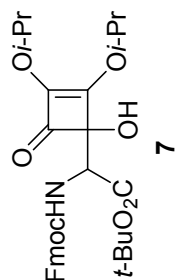



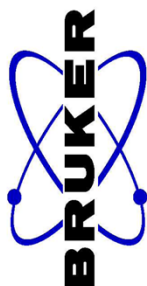

Current Data Parameters  
 NAME MK-Fmoc-SgGly (CO<sub>2</sub>Bu) -OPr-H1  
 EXPNO 10  
 PROCNO 1

F2 - Acquisition Parameters

Date\_ 20140719  
 Time 22.39  
 INSTRUM av300  
 PROBD 5 mm PABBO BB-  
 PULPROG zg30  
 TD 65536  
 SOLVENT CDC13  
 NS 16  
 DS 2  
 SWH 6188.119 Hz  
 FIDRES 0.094423 Hz  
 AQ 5.2953587 sec  
 RG 36  
 DW 80.800 usec  
 DE 3.50 usec  
 TE 295.4 K  
 D1 1.00000000 sec

===== CHANNEL f1 =====

NUC1 1H  
 PL 15.00 usec  
 PL1 7.5000000 W  
 SF01 300.1318534 MHz  
 F2 - Processing parameters  
 SI 32768  
 SF 300.1300064 MHz  
 WDW EM  
 SSB 0  
 LB 0.30 Hz  
 GB 0  
 PC 1.00

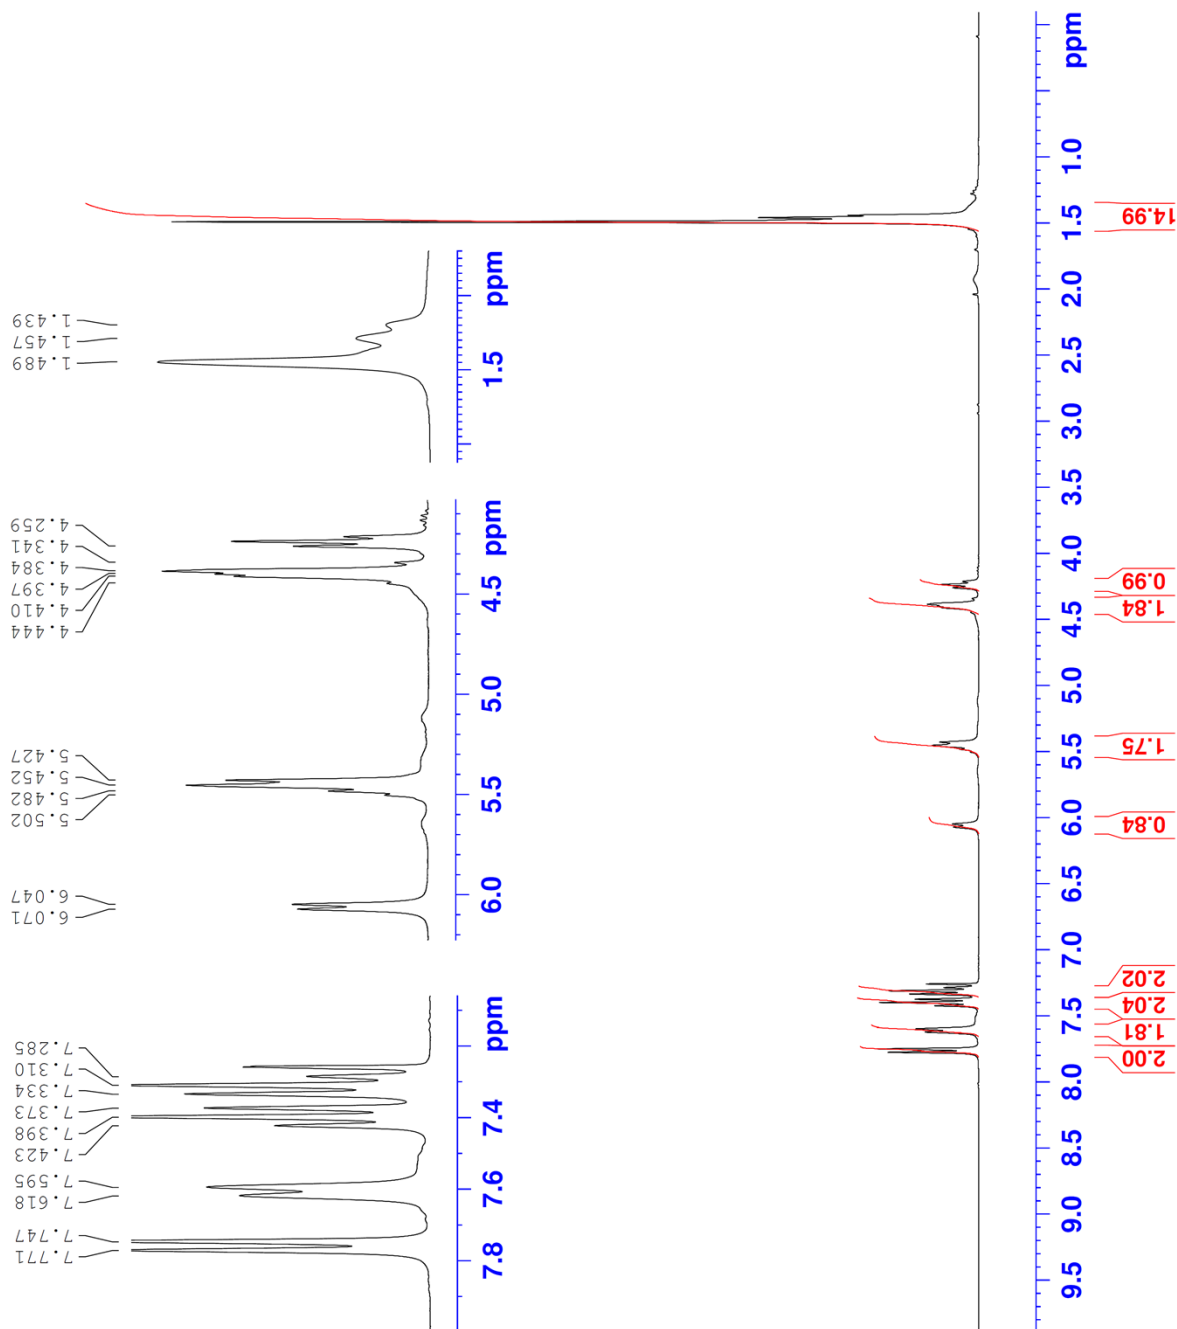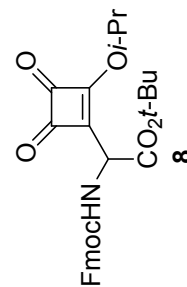

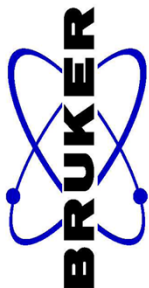

Current Data Parameters  
 NAME MK-Fmoc-SgGly(CO<sub>2</sub>Bu)-OPr-Cl3  
 EXPNO 10  
 PROCNO 1

F2 - Acquisition Parameters

Date\_ 20140719  
 Time 23:57  
 INSTRUM av300  
 PROBHD 5 mm F4BBO BB-  
 PULPROG zgpg30  
 TD 65536  
 SOLVENT CDCl<sub>3</sub>  
 NS 1200  
 DS 2  
 SWH 18028.846 Hz  
 FIDRES 0.275098 Hz  
 AQ 1.8175818 sec  
 RG 203  
 DW 27.733 usec  
 DE 6.50 usec  
 TE 296.1 K  
 D1 2.00000000 sec  
 D11 0.03000000 sec

===== CHANNEL f1 =====

NUC1 <sup>13</sup>C  
 P1 10.00 usec  
 PLW1 32.00000000 W  
 SFO1 75.4752953 MHz

===== CHANNEL f2 =====

CPDPRG2 waltz16  
 NUC2 <sup>1</sup>H  
 PCPD2 90.00 usec  
 PLW2 7.80000019 W  
 PLW12 0.21667001 W  
 PLW13 0.17550001 W  
 SFO2 300.1312005 MHz

F2 - Processing parameters

SI 32768  
 SF 75.4677560 MHz  
 EM  
 WDW 0  
 SSB 0  
 LB 1.00 Hz  
 GB 0  
 FC 1.40

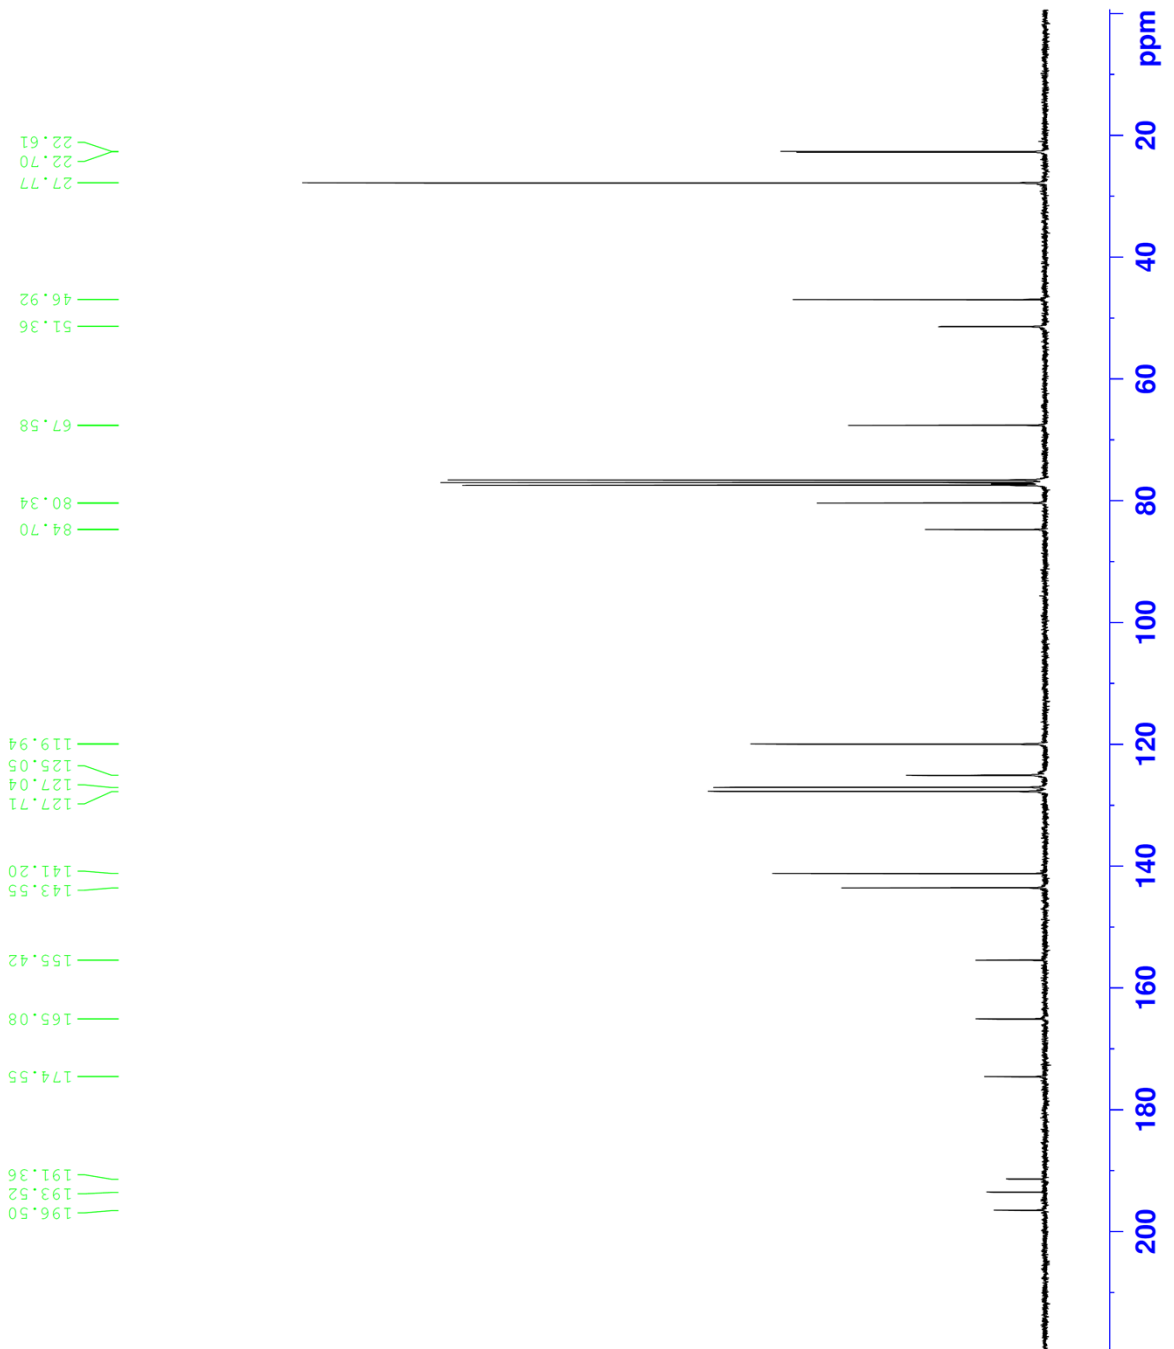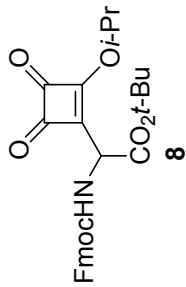

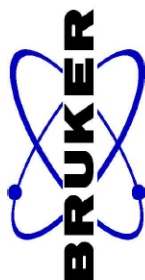

Current Data Parameters  
 NAME MK-Fmoc-SqGly-OPr-H1  
 EXPNO 40  
 PROCNO 1

F2 - Acquisition Parameters

Date\_ 20140724  
 Time 10.28  
 INSTRUM av300  
 PROBHD 5 mm PABBO BB-  
 PULPROG zg30  
 TD 65536  
 SOLVENT CDCl3  
 NS 48  
 DS 2  
 SWH 6188.119 Hz  
 FIDRES 0.094423 Hz  
 AQ 5.2953587 sec  
 RG 203  
 DW 80.800 usec  
 DE 6.50 usec  
 TE 295.5 K  
 D1 1.00000000 sec

===== CHANNEL f1 =====  
 NUC1 1H  
 P1 15.00 usec  
 PLW1 7.50000000 W  
 SF01 300.1318534 MHz

F2 - Processing parameters  
 SI 32768  
 SF 300.1300067 MHz  
 WDW EM  
 SSB 0  
 LB 0.30 Hz  
 GB 0  
 PC 1.00

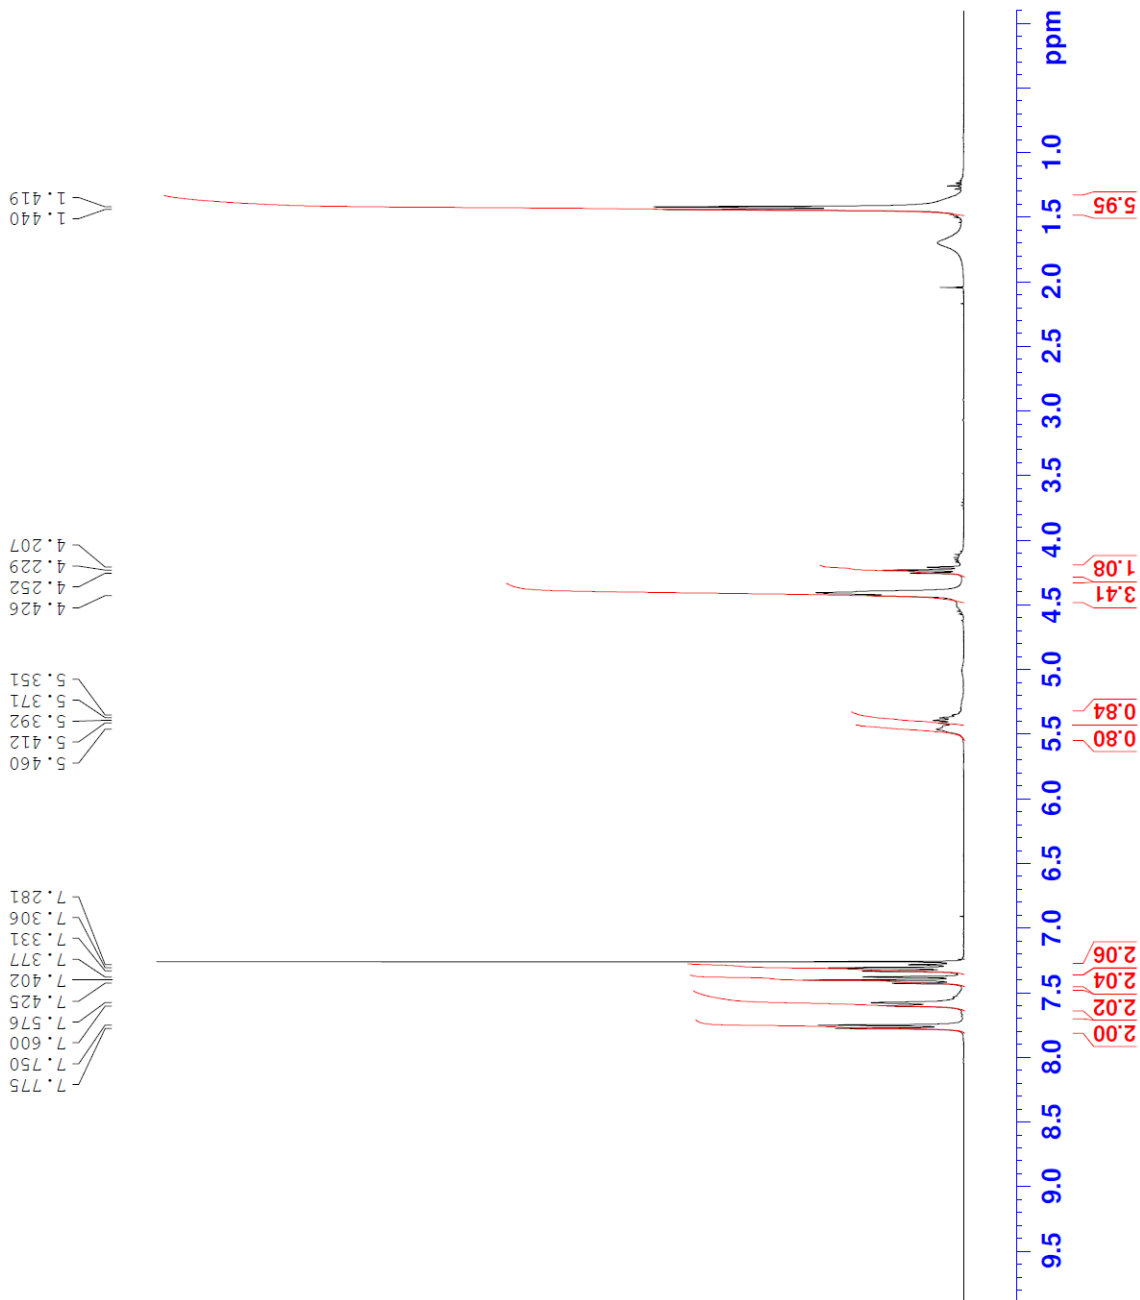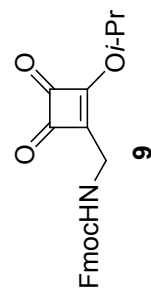

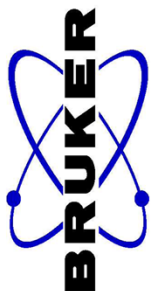

Current Data Parameters  
 NAME MK-Fmoc-SgGly-OPr-C13  
 EXPNO 20  
 PROCNO 1

F2 - Acquisition Parameters

Date\_ 20140721  
 Time 5.16  
 INSTRUM av300  
 PROBHD 5 mm PABBO BB-  
 PULPROG zgpg30  
 TD 65536  
 SOLVENT CDCl3  
 NS 2400  
 DS 2  
 SWH 18028.846 Hz  
 FIDRES 0.275098 Hz  
 AQ 1.8175818 sec  
 RG 203  
 DW 27.733 usec  
 DE 6.50 usec  
 TE 296.1 K  
 D1 2.00000000 sec  
 D11 0.03000000 sec

===== CHANNEL f1 =====  
 NUC1 13C  
 P1 10.00 usec  
 PLW1 32.00000000 W  
 SFO1 75.4752953 MHz

===== CHANNEL f2 =====  
 CPDPRG2 waltz16  
 NUC2 1H  
 P2 90.00 usec  
 PLW2 7.80000019 W  
 PLW12 0.21667001 W  
 PLW13 0.17550001 W  
 SFO2 300.1312005 MHz

F2 - Processing parameters  
 SI 32768  
 SF 75.4677586 MHz  
 EM  
 WDW 0  
 SSB 1.00 Hz  
 LB 0  
 GB 1.40  
 PC

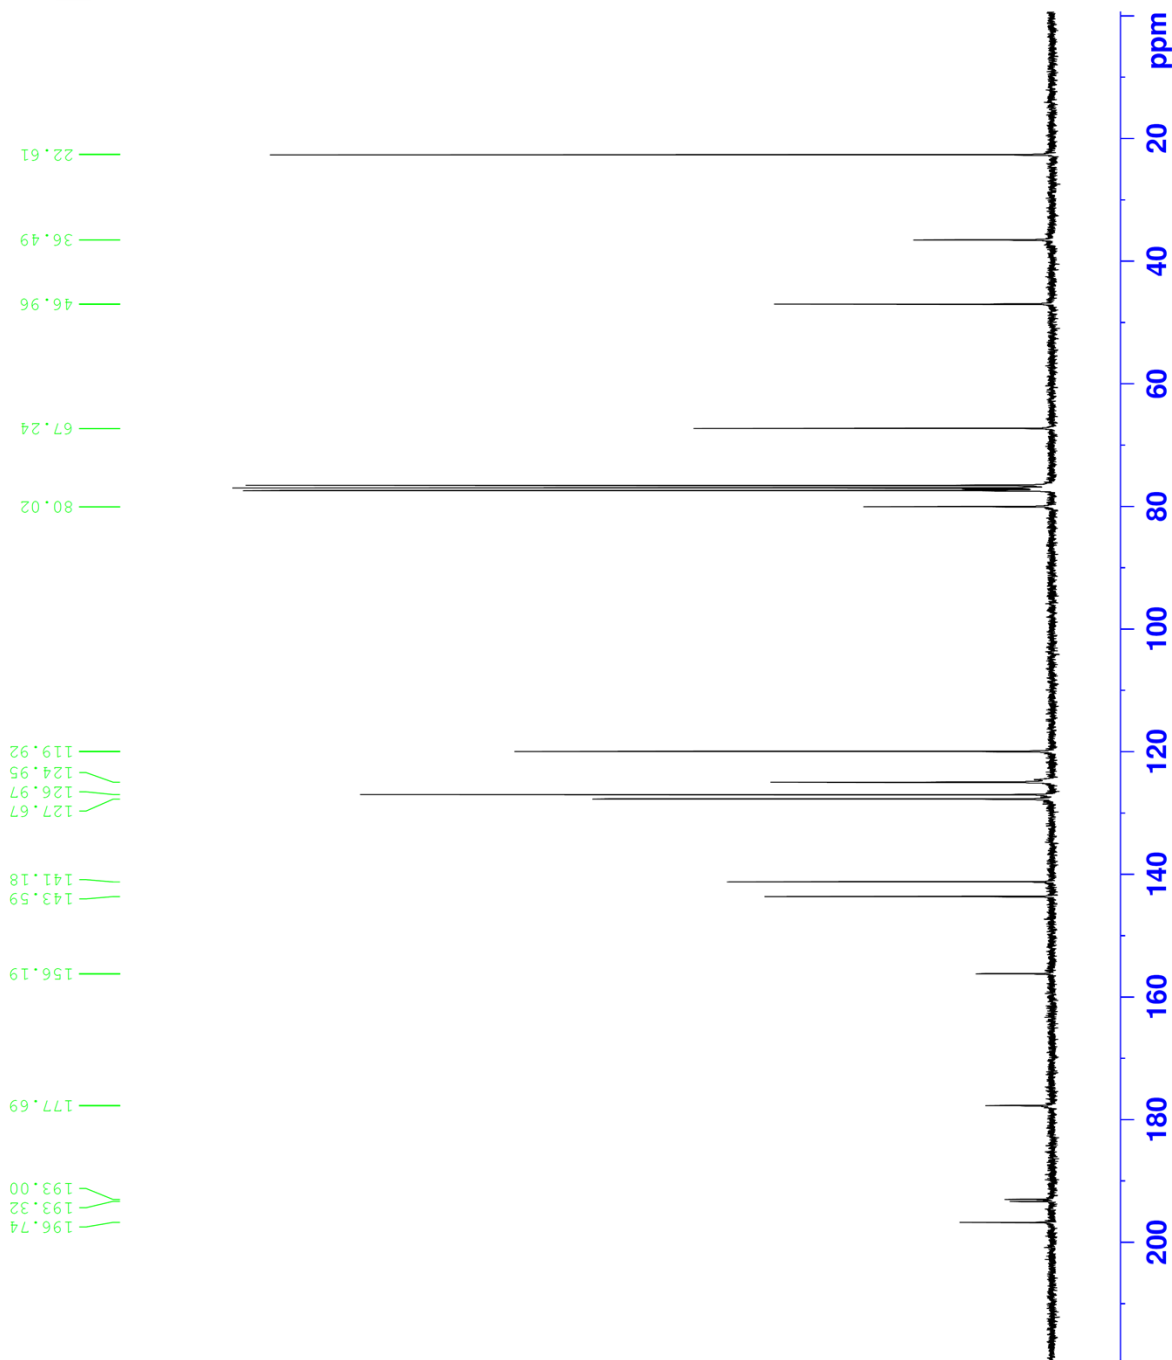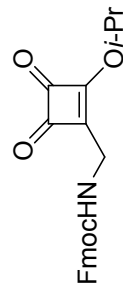

9

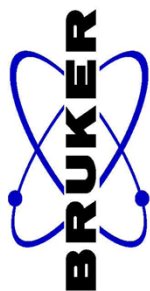

Current Data Parameters  
 NAME MK-Fmoc-SgGly-Phe-OBn-H1  
 EXPNO 20  
 PROCNO 1

F2 - Acquisition Parameters

Date\_ 20140722  
 Time 6.39  
 INSTRUM av300  
 PROBHD 5 mm FAPBO BB-  
 PULPROG zg30  
 TD 65336  
 SOLVENT CDCl3  
 NS 16  
 DS 2  
 SWH 6188.119 Hz  
 FIDRES 0.094423 Hz  
 AQ 5.2953587 sec  
 RG 36  
 DW 80.800 usec  
 DE 6.50 usec  
 TE 295.6 K  
 D1 1.00000000 sec

===== CHANNEL f1 =====  
 NUC1 1H  
 P1 15.00 usec  
 PL1 7.50000000 W  
 SFO1 300.1318534 MHz

F2 - Processing parameters

SI 32768  
 SF 300.1300063 MHz  
 EM  
 WDW 0  
 SSB 0  
 LB 0.30 Hz  
 GB 0  
 PC 1.00

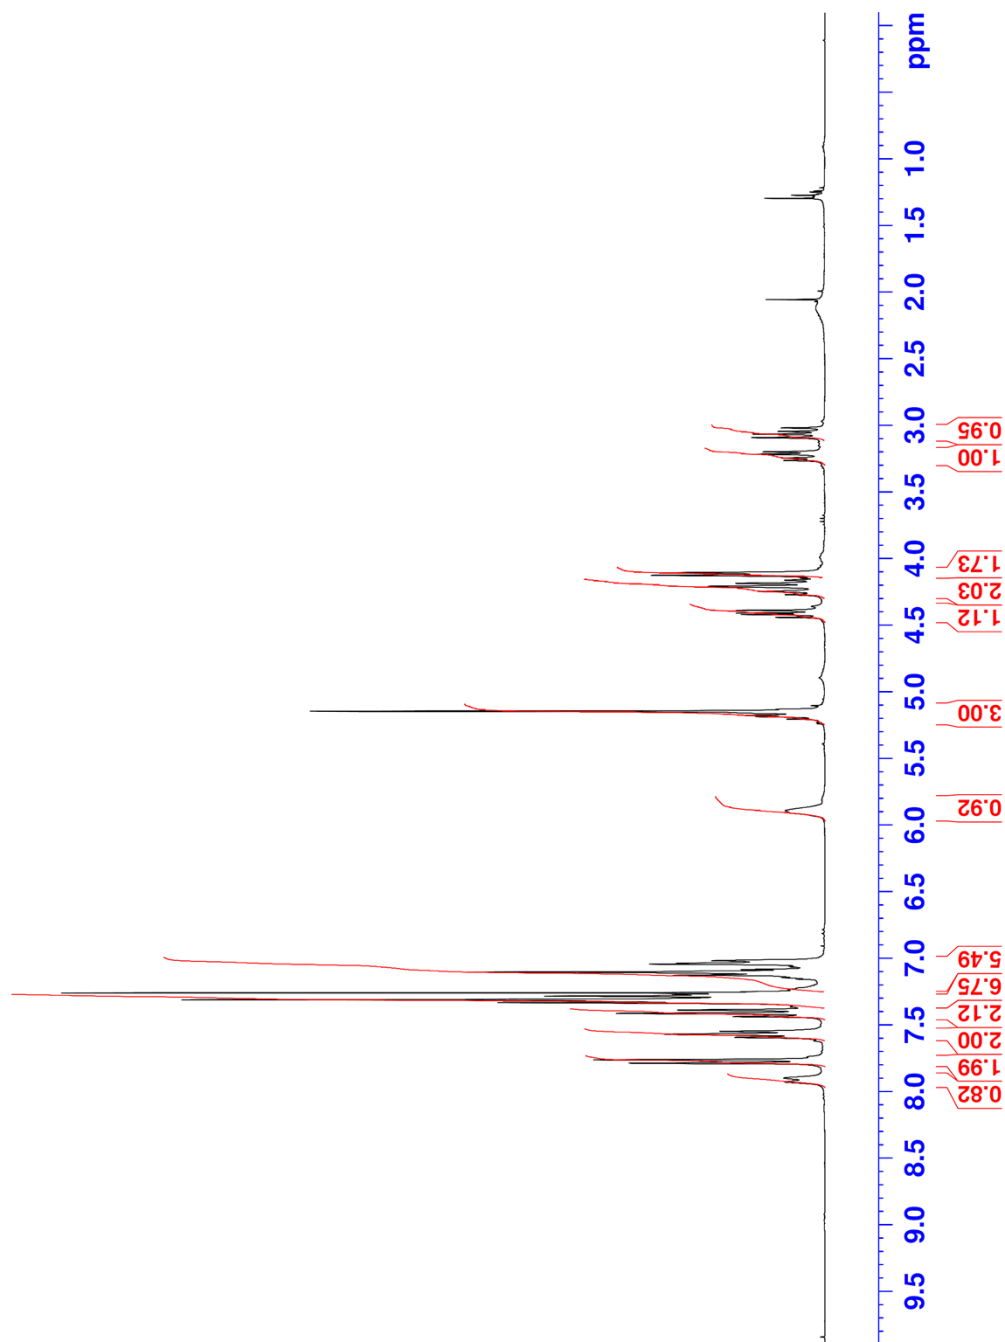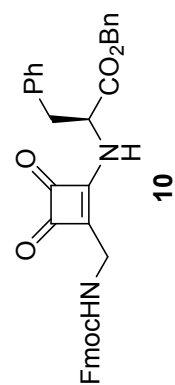

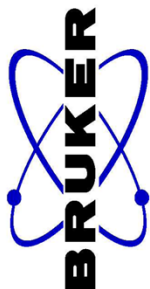

Current Data Parameters  
 NAME MK-Fmoc-SgGly-Phe-OBn-Cl3  
 EXPNO 20  
 PROCNO 1

F2 - Acquisition Parameters

Date\_ 20140722  
 Time 8.23  
 INSTRUM av300  
 PROBHD 5 mm PABBO BB-  
 PULPROG zgpg30  
 TD 65536  
 SOLVENT CDCl3  
 NS 1600  
 DS 2  
 SWH 18028.846 Hz  
 FIDRES 0.275098 Hz  
 AQ 1.8175818 sec  
 RG 203  
 DW 27.733 usec  
 DE 6.50 usec  
 TE 296.3 K  
 D1 2.00000000 sec  
 D11 0.03000000 sec

===== CHANNEL f1 =====  
 NUC1 13C  
 P1 10.00 usec  
 PLW1 32.00000000 W  
 SFO1 75.4752953 MHz

===== CHANNEL f2 =====  
 CPDPRG2 waltz16  
 NUC2 1H  
 PCPD2 90.00 usec  
 PLW2 7.80000019 W  
 PLW12 0.21667001 W  
 PLW13 0.17550001 W  
 SFO2 300.1312005 MHz

F2 - Processing parameters  
 SI 32768  
 SF 75.4677591 MHz  
 WDW EM  
 SSB 0  
 LB 1.00 Hz  
 GB 0  
 PC 1.40

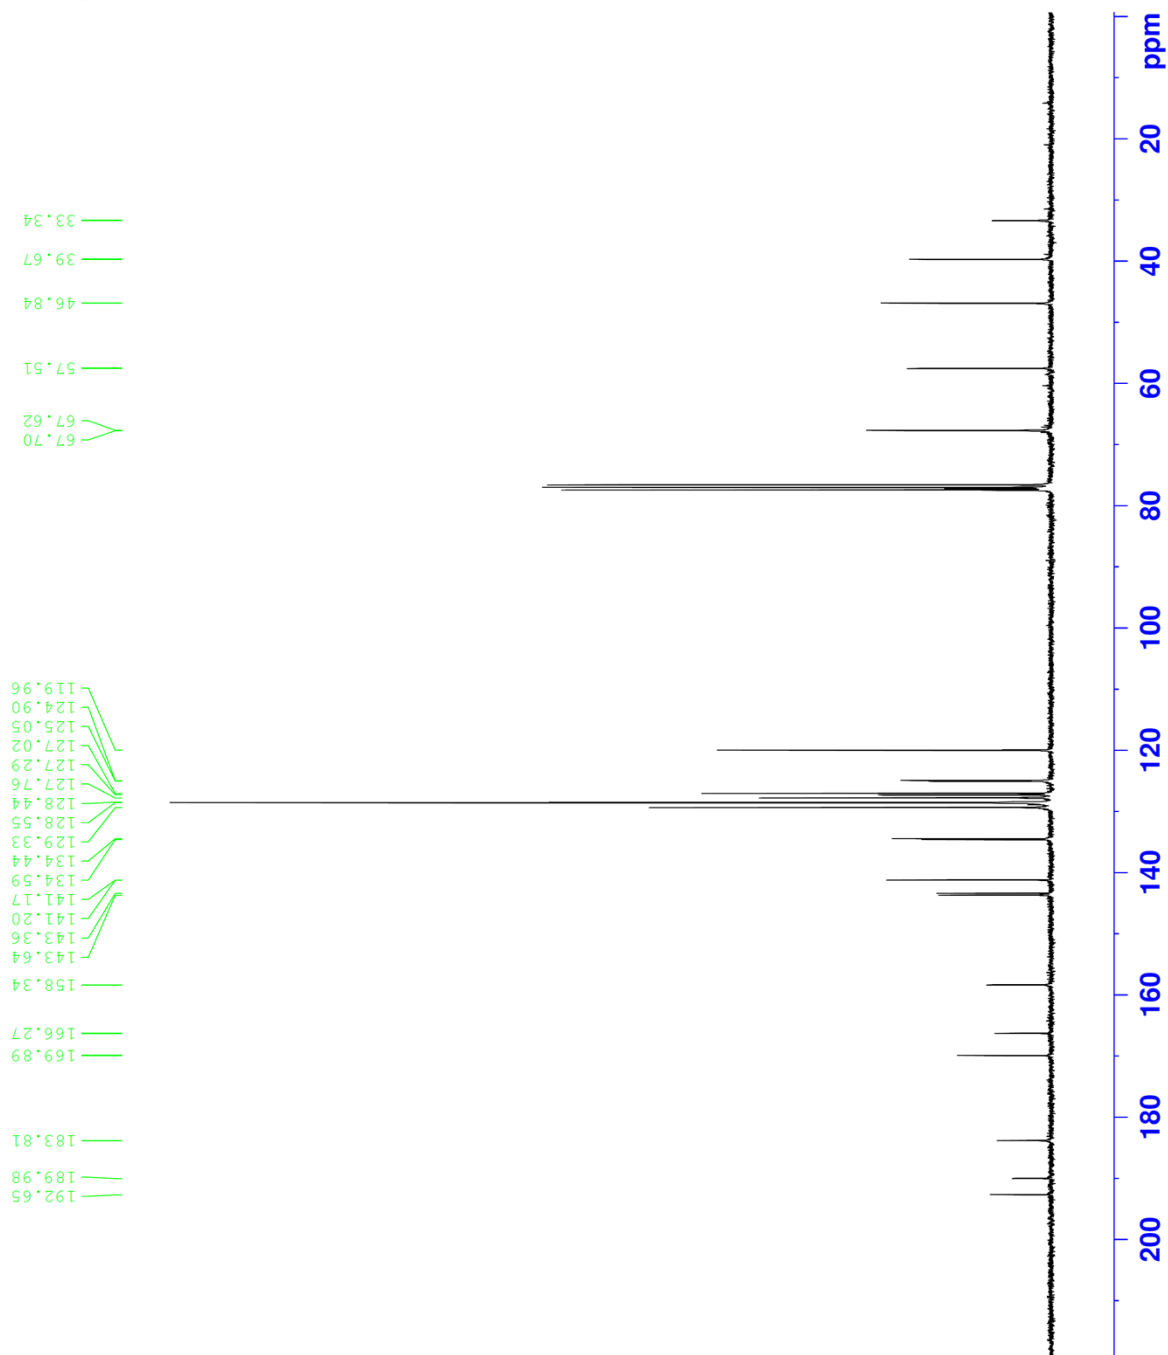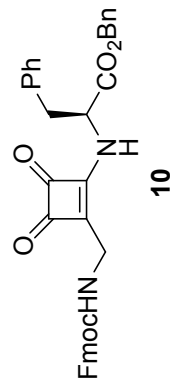

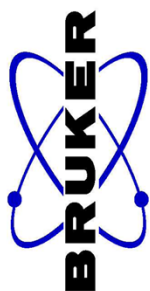

Current Data Parameters  
 NAME MK-FmocGly-Gly-HCB-H1  
 EXPNO 10  
 PROCNO 1

F2 - Acquisition Parameters

Date\_ 20140720  
 Time 2.28  
 INSTRUM av300  
 PROBHD 5 mm PABBO BB-  
 PULPROG zg30  
 TD 65536  
 SOLVENT CDCl3  
 NS 16  
 DS 2  
 SWH 6188.119 Hz  
 FIDRES 0.094423 Hz  
 AQ 5.2953587 sec  
 RG 22.6  
 DW 80.800 usec  
 DE 6.50 usec  
 TE 295.4 K  
 D1 1.00000000 sec

===== CHANNEL f1 =====  
 NUC1 1H  
 P1 15.00 usec  
 PLW1 7.5000000 W  
 SFO1 300.1318534 MHz

F2 - Processing parameters

SI 32768  
 SF 300.1300064 MHz  
 WDW EM  
 SSB 0  
 LB 0.30 Hz  
 GB 0  
 PC 1.00

1.465  
1.440  
1.386  
1.373  
1.366  
1.354  
1.257  
1.236  
1.215

6.101  
6.003  
5.035  
5.006  
4.967  
4.940  
4.844  
4.361  
4.335  
4.241  
4.217  
4.194  
4.103  
4.083  
4.069  
4.045  
4.025  
4.016  
3.999  
3.959  
3.941

7.734  
7.710  
7.607  
7.589  
7.381  
7.357  
7.332  
7.295  
7.271  
7.217  
7.190

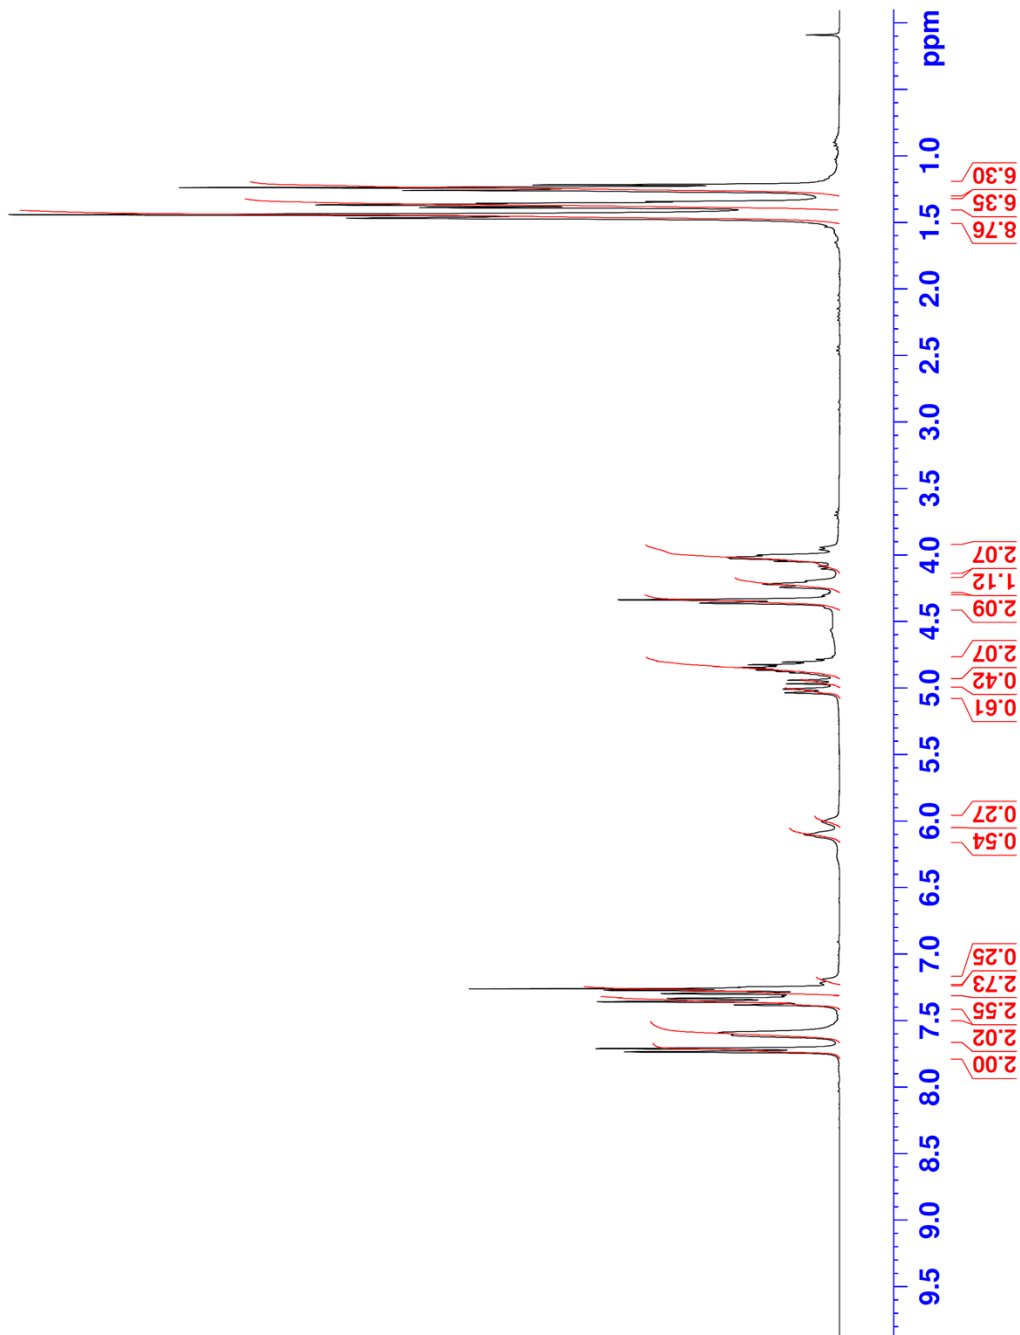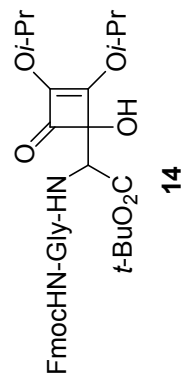

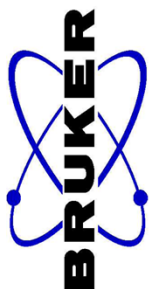

Current Data Parameters  
 NAME MK-FmocGly-Gly-HCB-Cl3  
 EXPNO 10  
 PROCNO 1

# F2 - Acquisition Parameters

Date\_ 20140720  
 Time 5.04  
 INSTRUM av300  
 PROBD 5 mm PABBO BB-  
 PULPROG zgpg30  
 TD 65536  
 SOLVENT CDCl3  
 NS 2400  
 DS 2  
 SWH 18028.846 Hz  
 FIDRES 0.275098 Hz  
 AQ 1.8175818 sec  
 RG 203  
 DW 27.733 usec  
 DE 6.50 usec  
 TE 296.0 K  
 D1 2.00000000 sec  
 D11 0.03000000 sec

===== CHANNEL f1 =====  
 NUC1 13C  
 P1 10.00 usec  
 PLW1 32.00000000 W  
 SFO1 75.4752953 MHz

===== CHANNEL f2 =====  
 CPDPRG2 waltz16  
 NUC2 1H  
 P2 90.00 usec  
 PLW2 7.80000019 W  
 PLW12 0.21667001 W  
 PLW13 0.17550001 W  
 SFO2 300.1312005 MHz

F2 - Processing parameters  
 SI 32768  
 SF 75.4677605 MHz  
 WDW EM  
 SSB 0  
 LB 1.00 Hz  
 GB 0  
 PC 1.40

27.70  
 27.67  
 22.63  
 22.57  
 22.41  
 22.35  
 22.11  
 22.05  
 44.25  
 46.90  
 56.44  
 56.89  
 67.29  
 73.74  
 73.84  
 77.53  
 83.11  
 83.21  
 85.42  
 85.53

182.75  
 182.25  
 170.02  
 169.72  
 167.63  
 167.49  
 164.73  
 164.57  
 156.72  
 156.53  
 143.80  
 143.76  
 143.73  
 141.07  
 132.24  
 127.49  
 126.94  
 125.14  
 119.73

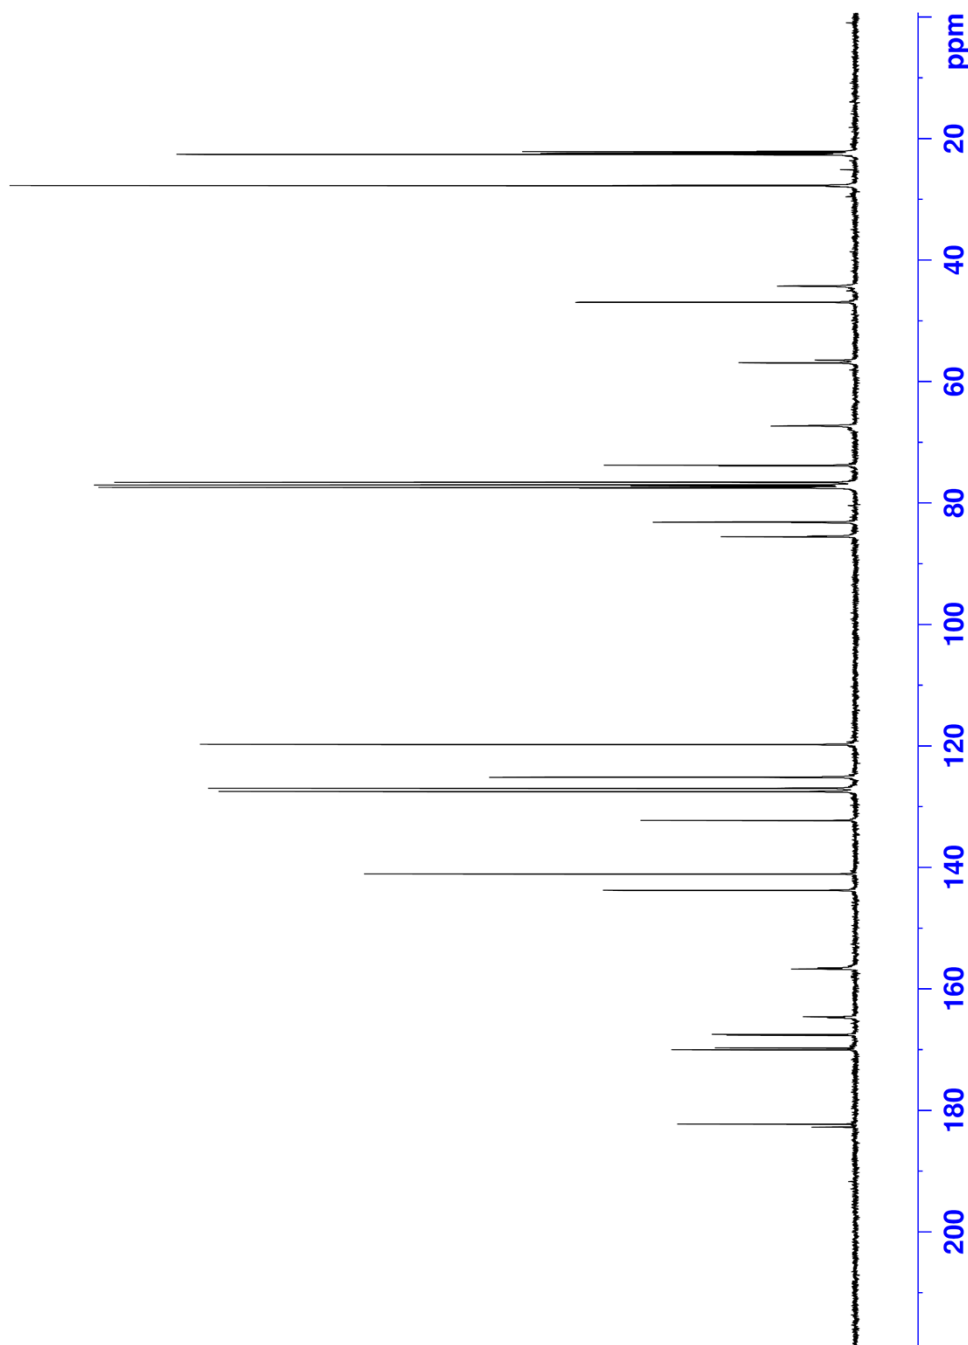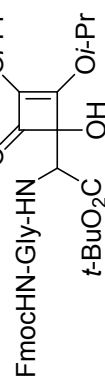



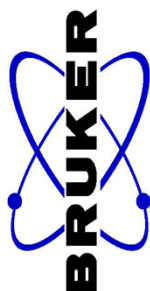

Current Data Parameters  
 NAME MR-Fmoc-Gly-SgGly (CO<sub>2</sub>Bu)-OPr-H1  
 EXNO 10  
 PROCNO 1

F2 - Acquisition Parameters  
 Date\_ 20140720  
 Time 13.31  
 INSTRUM avn001  
 PROBHD 5 mm PABBO-1H  
 PULPROG zg30  
 TD 65536  
 SOLVENT CDCl<sub>3</sub>  
 NS 48  
 DS 2  
 SWH 6188.119 Hz  
 FIDRES 0.094423 Hz  
 AQ 5.295567 sec  
 RG 3203  
 DW 80.800 usec  
 DE 6.50 usec  
 TE 295.8 K  
 D1 1.0000000 sec

CHANNEL f1  
 NUC1 1H  
 P1 15.00 usec  
 PL1 0.00 dB  
 PLW1 7.5000000 W  
 SFO1 300.1318534 MHz

F2 - Processing parameters  
 SI 32768  
 SF 300.1300050 MHz  
 WDM 0  
 SSB 0  
 GB 0  
 PC 1.00

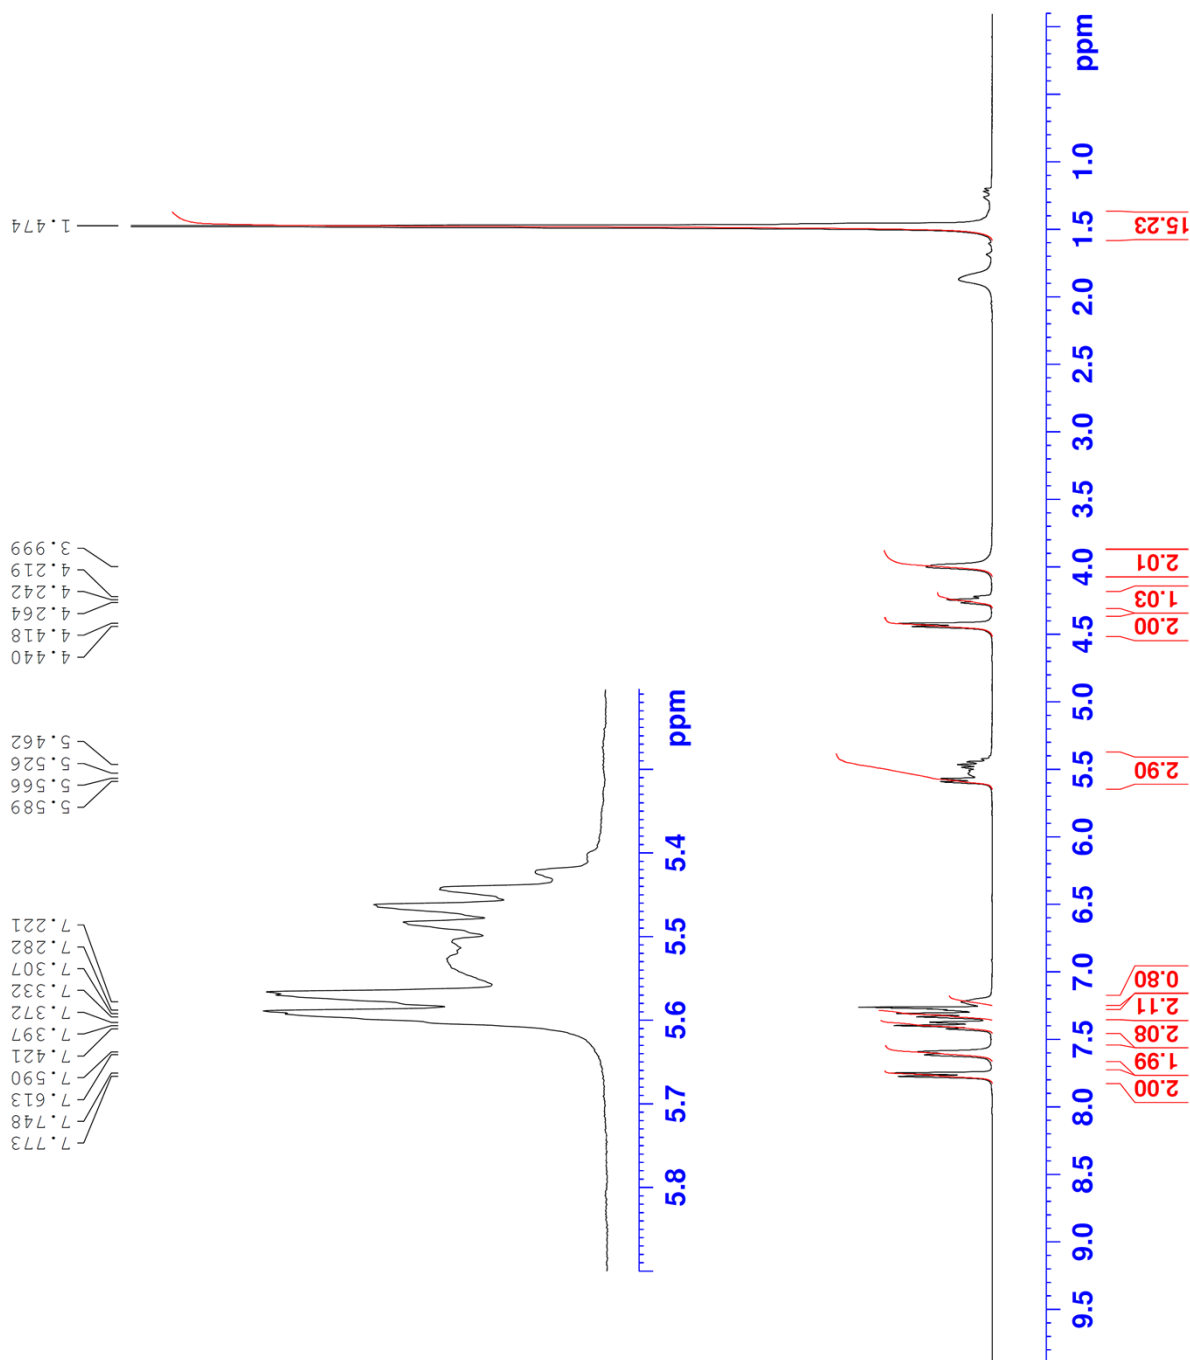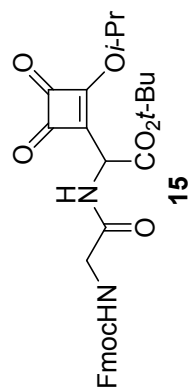

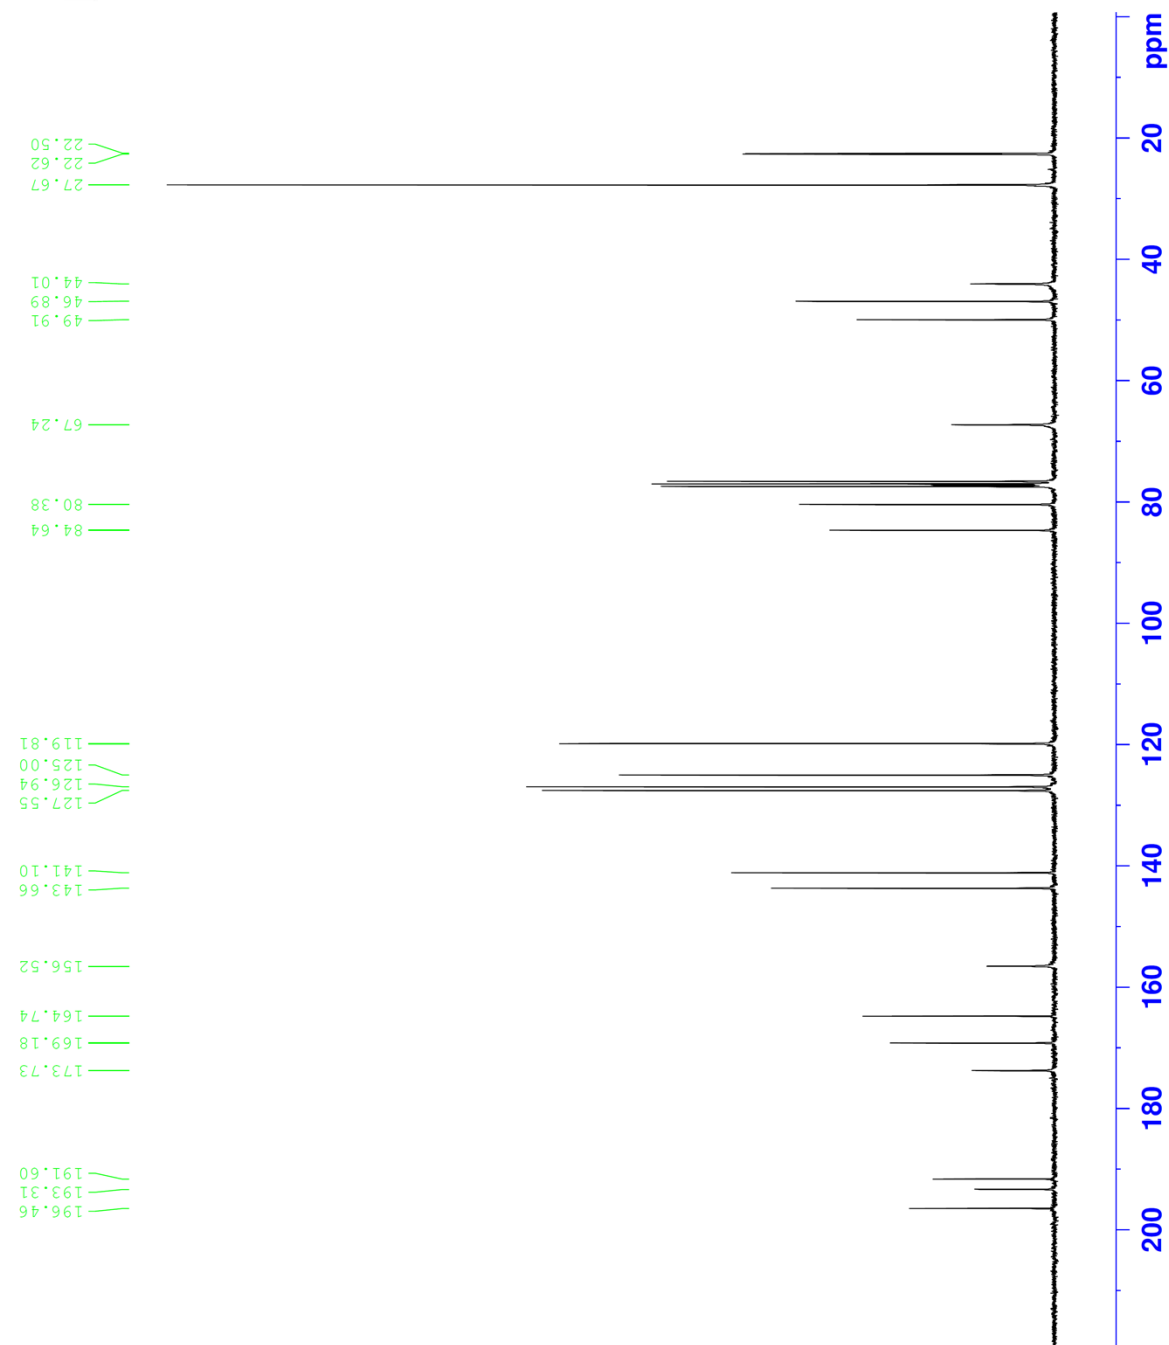

**15**

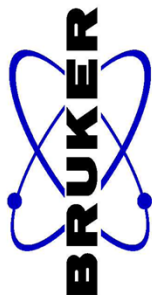

Current Data Parameters  
 NAME MK-Fmoc-Gly-Sggly-OiPr  
 EXPNO 10  
 PROCNO 1

F2 - Acquisition Parameters

Date\_ 20140626  
 Time 3.36  
 INSTRUM av300  
 PROBHD 5 mm PABBO BB-  
 PULPROG zg30  
 TD 65536  
 SOLVENT MeOD  
 NS 16  
 DS 2  
 SWH 6188.119 Hz  
 FIDRES 0.094423 Hz  
 AQ 5.2953587 sec  
 RG 128  
 DW 80.800 usec  
 DE 6.50 usec  
 TE 295.2 K  
 D1 1.00000000 sec

===== CHANNEL f1 =====  
 NUC1 1H  
 P1 15.00 usec  
 PLW1 15.0000000 W  
 SFO1 300.1318534 MHz

F2 - Processing parameters  
 SI 32768  
 SF 300.1300047 MHz  
 EM  
 SSB 0  
 LB 0.30 Hz  
 GB 0  
 PC 1.00

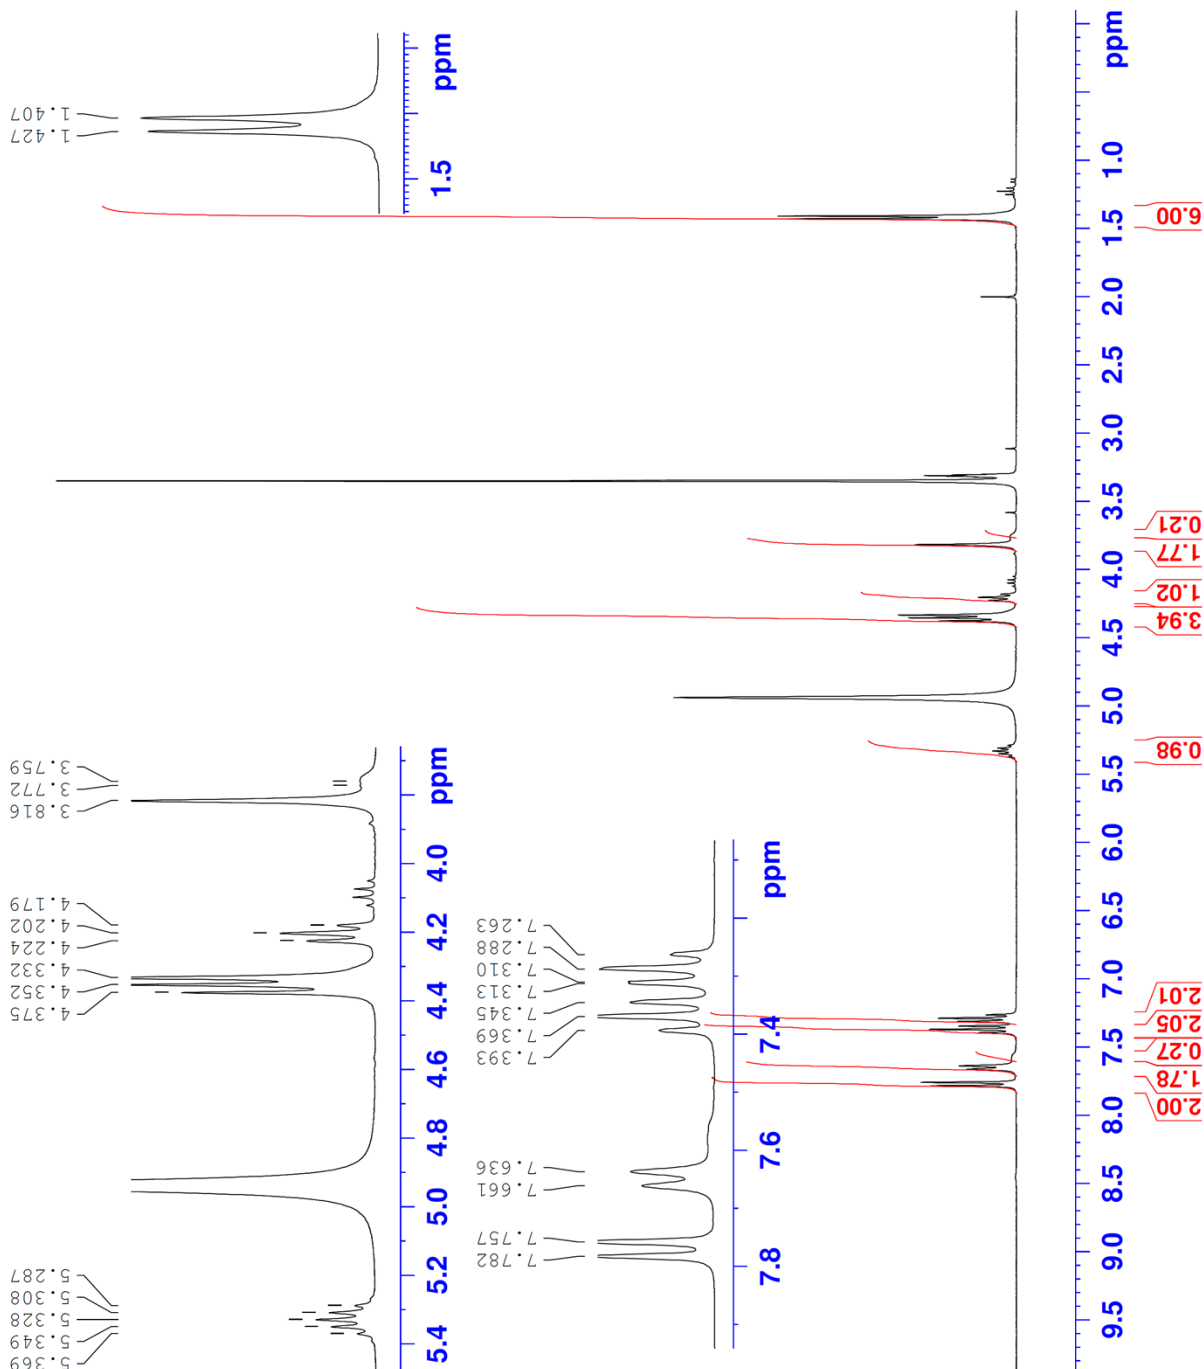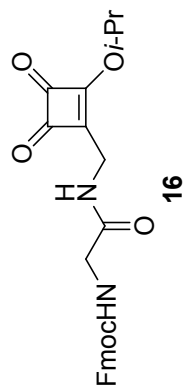

F:\ICZmNMRdata\FmocGlySQGlyOiPrCNMR.als

DFILE  
COMNT  
DATIM  
OBNUC  
EXMOD  
OBFRQ  
OBSET  
OBFIN  
POINT  
FREQU  
SCANS  
ACQTM  
PD  
PW1  
IRNUC  
CTEMP  
SLVNT  
EXREF  
BF  
RGAIN

F:\ICZmNMRdata\FmocGlySQGlyO  
Fri Aug 06 16:00:20 2010  
13C  
bcm  
100.40 MHz  
0.00 KHz  
135500.0 Hz  
32768  
27100.3 Hz  
1024  
1.209 sec  
1.791 sec  
5.0 us  
1H  
27.5 c  
CD3OD  
49.00 ppm  
0.62 Hz  
19

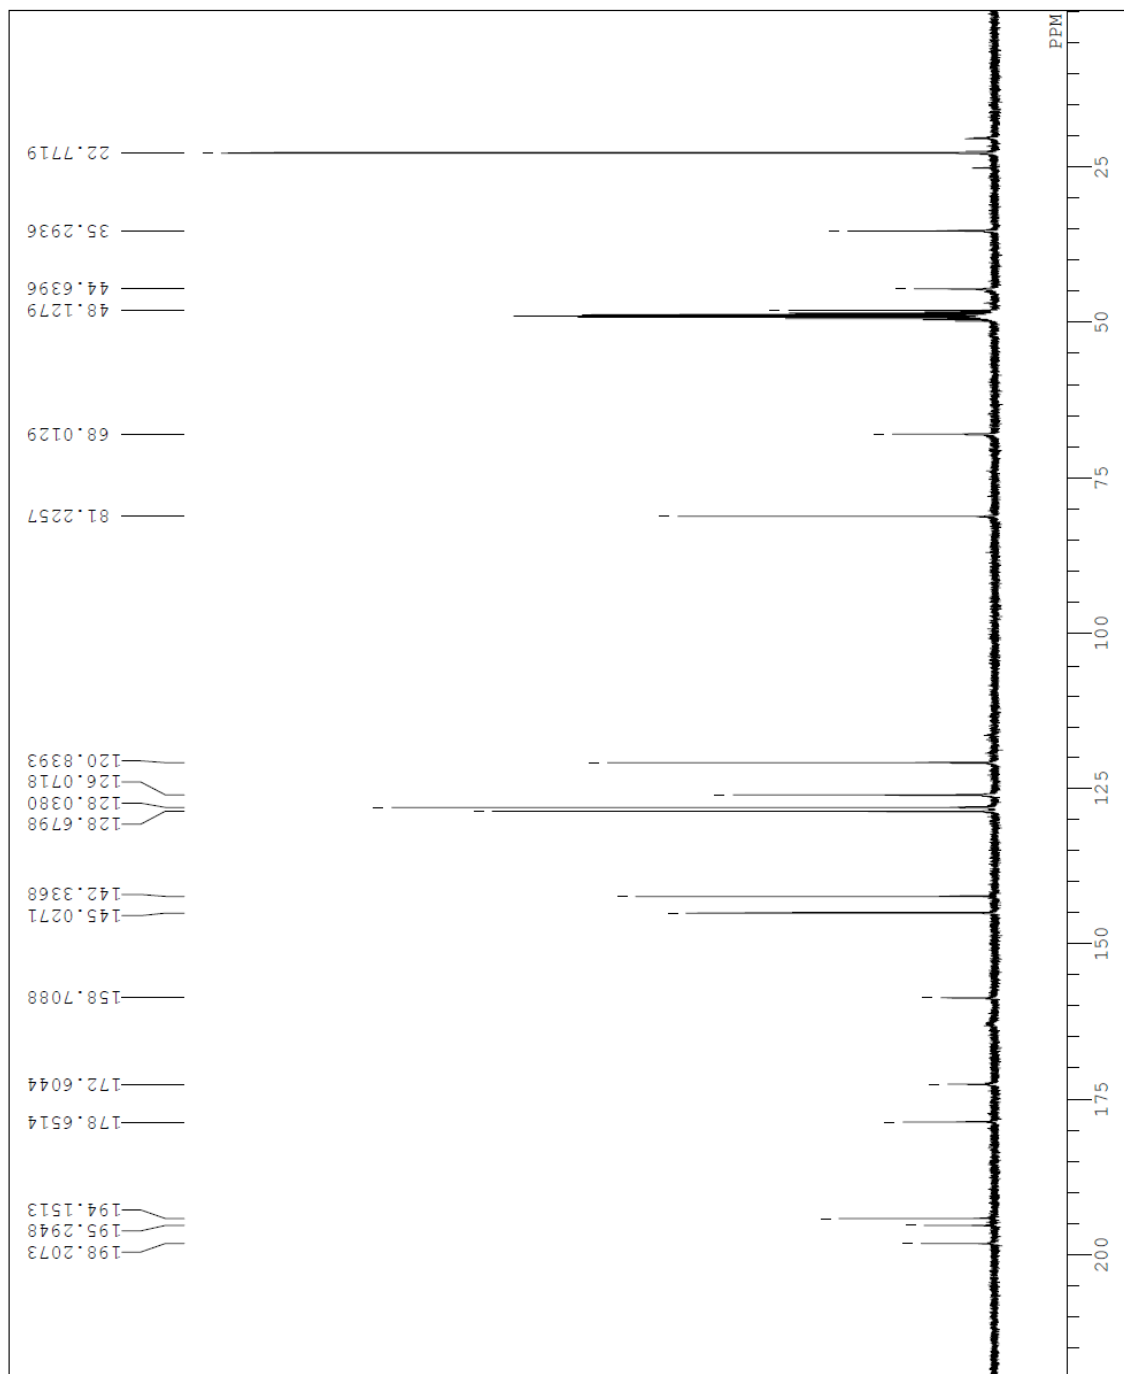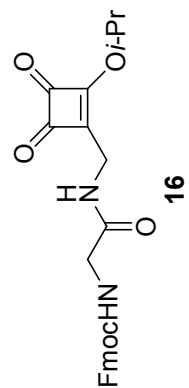

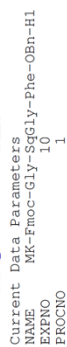

## F2 - Acquisition Parameters

|         |           |                |
|---------|-----------|----------------|
| Date_   |           | 20140721       |
| Instrum | PABBO BB- | av300          |
| Time    |           | 0.25           |
| PROBHD  | 5 mm      |                |
| PULPROG |           | zg30           |
| TID     |           | 6536           |
| SOLVENT |           | CDCI3          |
| NS      |           | 19             |
| SPH     |           | 6188.119 Hz    |
| FIDRES  |           | 0.094423 Hz    |
| AQ      |           | 5.235357 sec   |
| RQ      |           | 64             |
| DW      |           | 80.800 usec    |
| DE      |           | 6.50 usec      |
| TE      |           | 295.5 K        |
| D1      |           | 1.00000000 sec |

```
===== CHANNEL f1 =====
NUC1      1H
P1        15.00 usec
PLW1      7.5000000 W
SFO1     300.1318534 MHz
```

|                            |                 |
|----------------------------|-----------------|
| F2 - Processing parameters |                 |
| SI                         | 32768           |
| SF                         | 300.1300055 MHz |
| EM                         |                 |
| WDW                        | 0               |
| SSB                        |                 |
| LB                         | 0.30 Hz         |
| GB                         | 0               |
| PC                         | 1.00            |

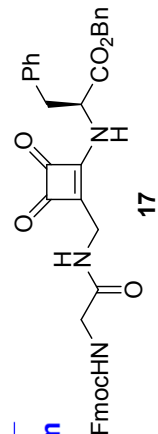

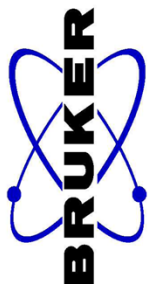

Current Data Parameters  
 NAME MK-Fmoc-Gly-SqGly-Phe-OBn-Cl3  
 EXPNO 10  
 PROCNO 1

F2 - Acquisition Parameters  
 Date\_ 20140721  
 Time 2.35  
 INSTRUM av300  
 PROBD 5 mm PABBO BB-  
 PULPROG zgpg30  
 TD 65536  
 SOLVENT CDCl3  
 NS 2000  
 DS 2  
 SWH 18028.84 Hz  
 FIDRES 0.275598 Hz  
 AQ 1.8175818 sec  
 RG 203  
 DW 27.733 usec  
 DE 6.50 usec  
 TE 296.1 K  
 D1 2.0000000 sec  
 D11 0.0300000 sec

===== CHANNEL f1 =====  
 NUC1 13C  
 P1 130  
 PL1 0.00 usec  
 SFO1 32.0000000 MHz  
 SF01 75.4752953 MHz

===== CHANNEL f2 =====  
 CPDPRG2 waltz16  
 NUC2 1H  
 P2 90.00 usec  
 PL2 7.80000019 W  
 PLW2 0.21667001 W  
 PLW3 0.17550001 W  
 SFO2 300.132005 MHz

F2 - Processing Parameters  
 SI 32768  
 SF 75.4677553 MHz  
 WDW EM  
 SSB 0  
 LB 1.00 Hz  
 GB 0  
 FC 1.40

192.40  
 190.11  
 183.73  
 171.76  
 170.04  
 165.95  
 156.70  
 143.62  
 143.59  
 141.25  
 134.77  
 134.66  
 129.41  
 128.61  
 128.45  
 127.74  
 127.34  
 127.04  
 124.91  
 119.97

67.71  
 67.04  
 57.80  
 47.06  
 44.27  
 39.40  
 32.47

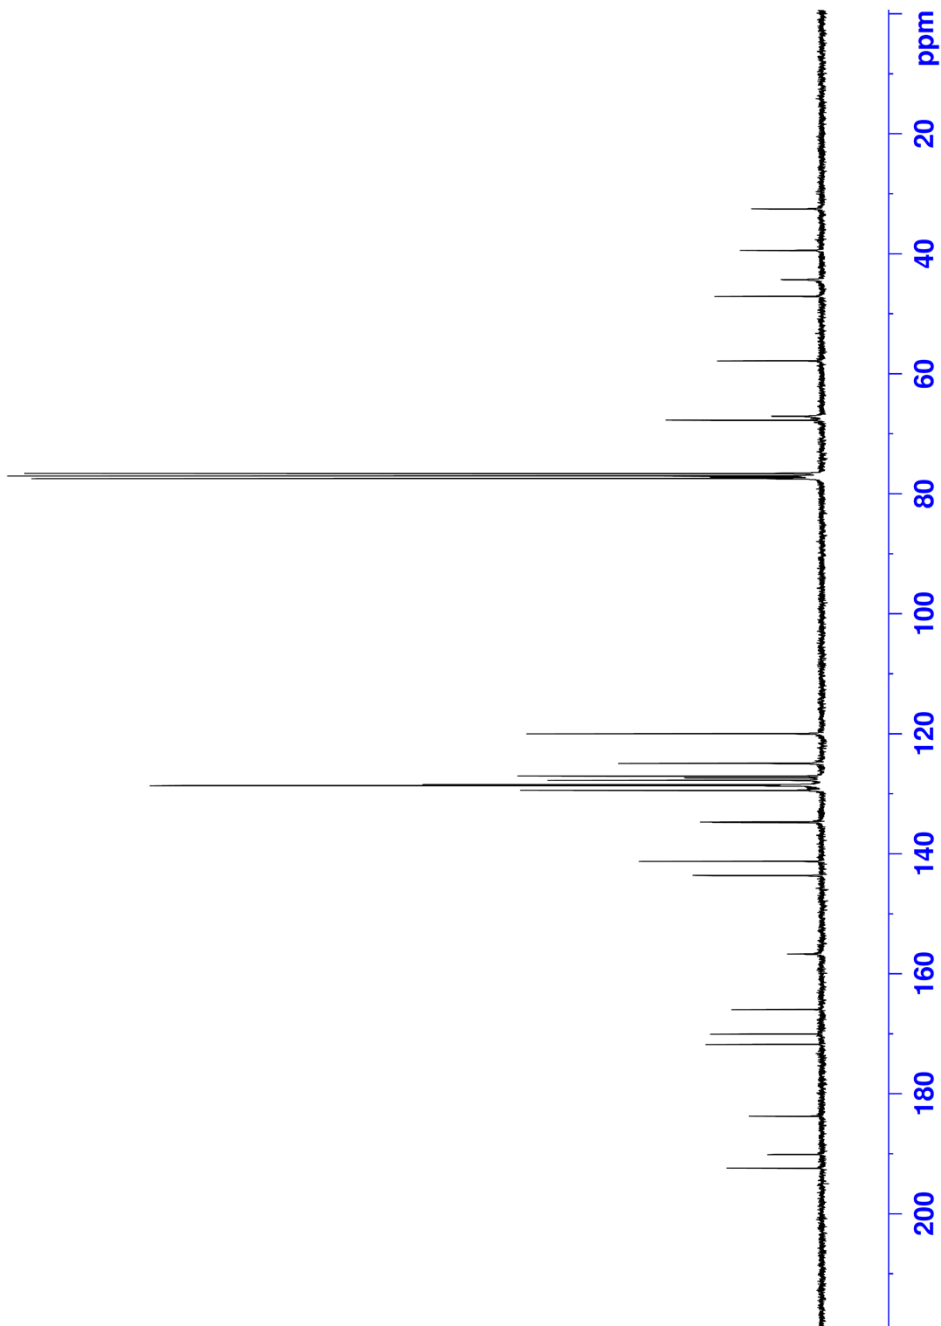

17

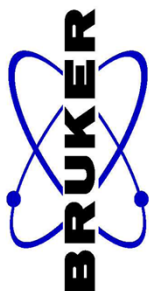

Current Data Parameters  
 NAME MK-Ac-Gly-Sqly-Phe-OBn-H1  
 EXPNO 10  
 PROCNO 1

F2 - Acquisition Parameters

Date\_ 20140721  
 Time 23:53  
 INSTRUM 5 mm PABBO BB-  
 PROBHD zg30  
 PULPROG zgpg30  
 ID zgpg30  
 SOLVENT CDCl3  
 NS 48  
 DS 2  
 SWH 6188.119 Hz  
 FIDRES 0.094423 Hz  
 AQ 5.2953587 sec  
 RG 203  
 DW 80.800 usec  
 DE 6.50 usec  
 TE 295.4 K  
 D1 1.00000000 sec

===== CHANNEL f1 =====

NUC1 1H  
 P1 15.00 usec  
 PLW1 7.50000000 W  
 SFO1 300.1318534 MHz

F2 - Processing parameters

SI 32768  
 SF 300.1300068 MHz  
 WDW EM  
 SSB 0  
 LB 0.30 Hz  
 GB 0  
 PC 1.00

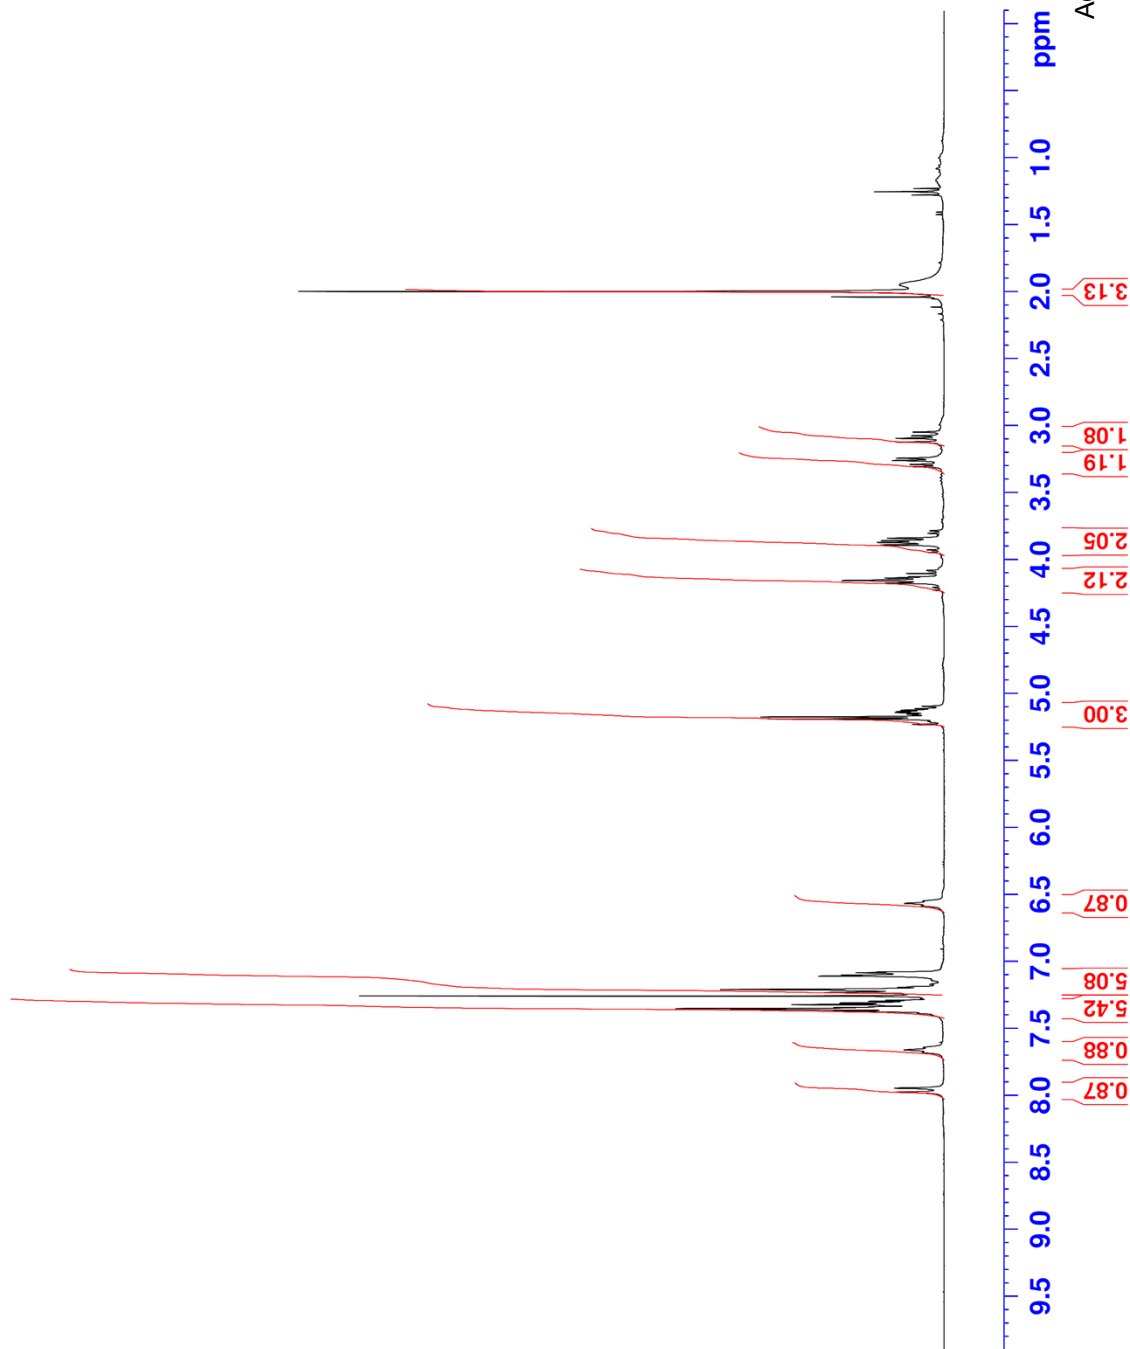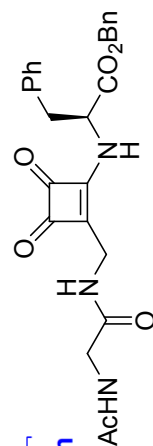

18

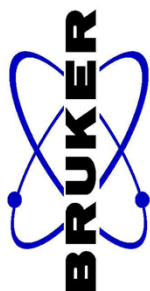

Current Data Parameters  
 NAME MK-Ac-Gly-Sqly-Phe-OBn-Cl3  
 EXNO 10  
 PROCNO 1

F2 - Acquisition Parameters

Date\_ 20140722  
 Time\_ 6.29  
 INSTRUM av300  
 PROBD 5 mm PABBO BB-  
 PULPROG zgpg30  
 TD 65536  
 SOLVENT CDCl3  
 NS 6000  
 DS 2  
 SWH 18028.846 Hz  
 FIDRES 0.275098 Hz  
 AQ 1.8175818 sec  
 RG 203  
 DW 27.733 usec  
 DE 6.50 usec  
 TE 295.7 K  
 D1 2.00000000 sec  
 D11 0.03000000 sec

===== CHANNEL f1 =====  
 NUC1 13C  
 P1 10.00 usec  
 PLW1 32.00000000 W  
 SFO1 75.4752953 MHz

===== CHANNEL f2 =====  
 CPDPRG2 waltz16  
 NUC2 1H  
 PCPD2 90.00 usec  
 PLW2 7.80000019 W  
 PLW12 0.21667001 W  
 PLW13 0.17550001 W  
 SFO2 300.1312005 MHz

F2 - Processing Parameters  
 SI 32768  
 SF 75.4677519 MHz  
 EM  
 WDW 0  
 SSB 0  
 LB 1.00 Hz  
 GB 0  
 FC 1.40

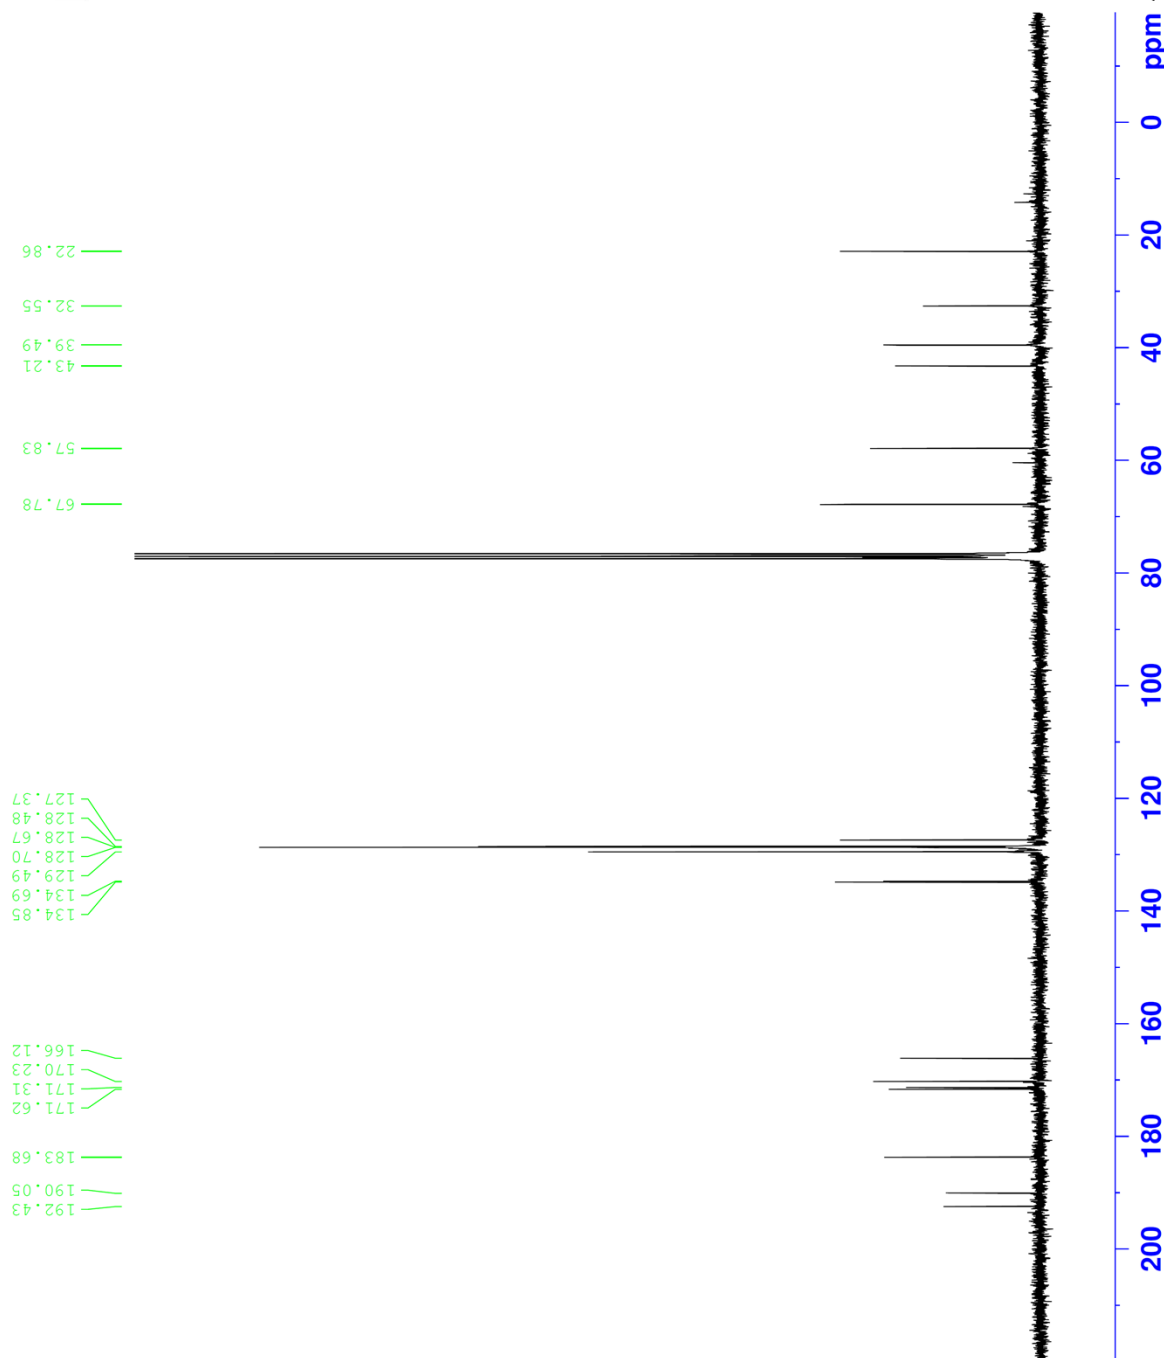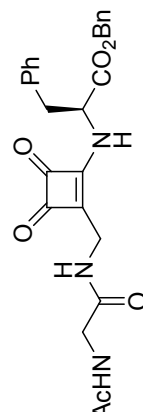

18



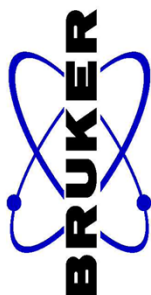

Current Data Parameters  
 NAME MK-10-42-2  
 EXPNO 20  
 PROCNO 1

F2 - Acquisition Parameters  
 Date\_ 20140607  
 Time 21.23  
 INSTRUM av300  
 PROBHD 5 mm PABBO BB-  
 PULPROG zg30  
 TD 65536  
 SOLVENT MeOD  
 NS 16  
 DS 2  
 SWH 6188.119 Hz  
 FIDRES 0.094423 Hz  
 AQ 5.2953587 sec  
 RG 203  
 DW 80.800 usec  
 DE 6.50 usec  
 TE 294.9 K  
 D1 1.00000000 sec

===== CHANNEL f1 =====  
 NUC1 1H  
 P1 15.00 usec  
 PLW1 15.0000000 W  
 SFO1 300.1318534 MHz

F2 - Processing parameters  
 SI 32768  
 SF 300.1300046 MHz  
 WDW EM  
 SSB 0  
 LB 0.30 Hz  
 GB 0  
 PC 1.00

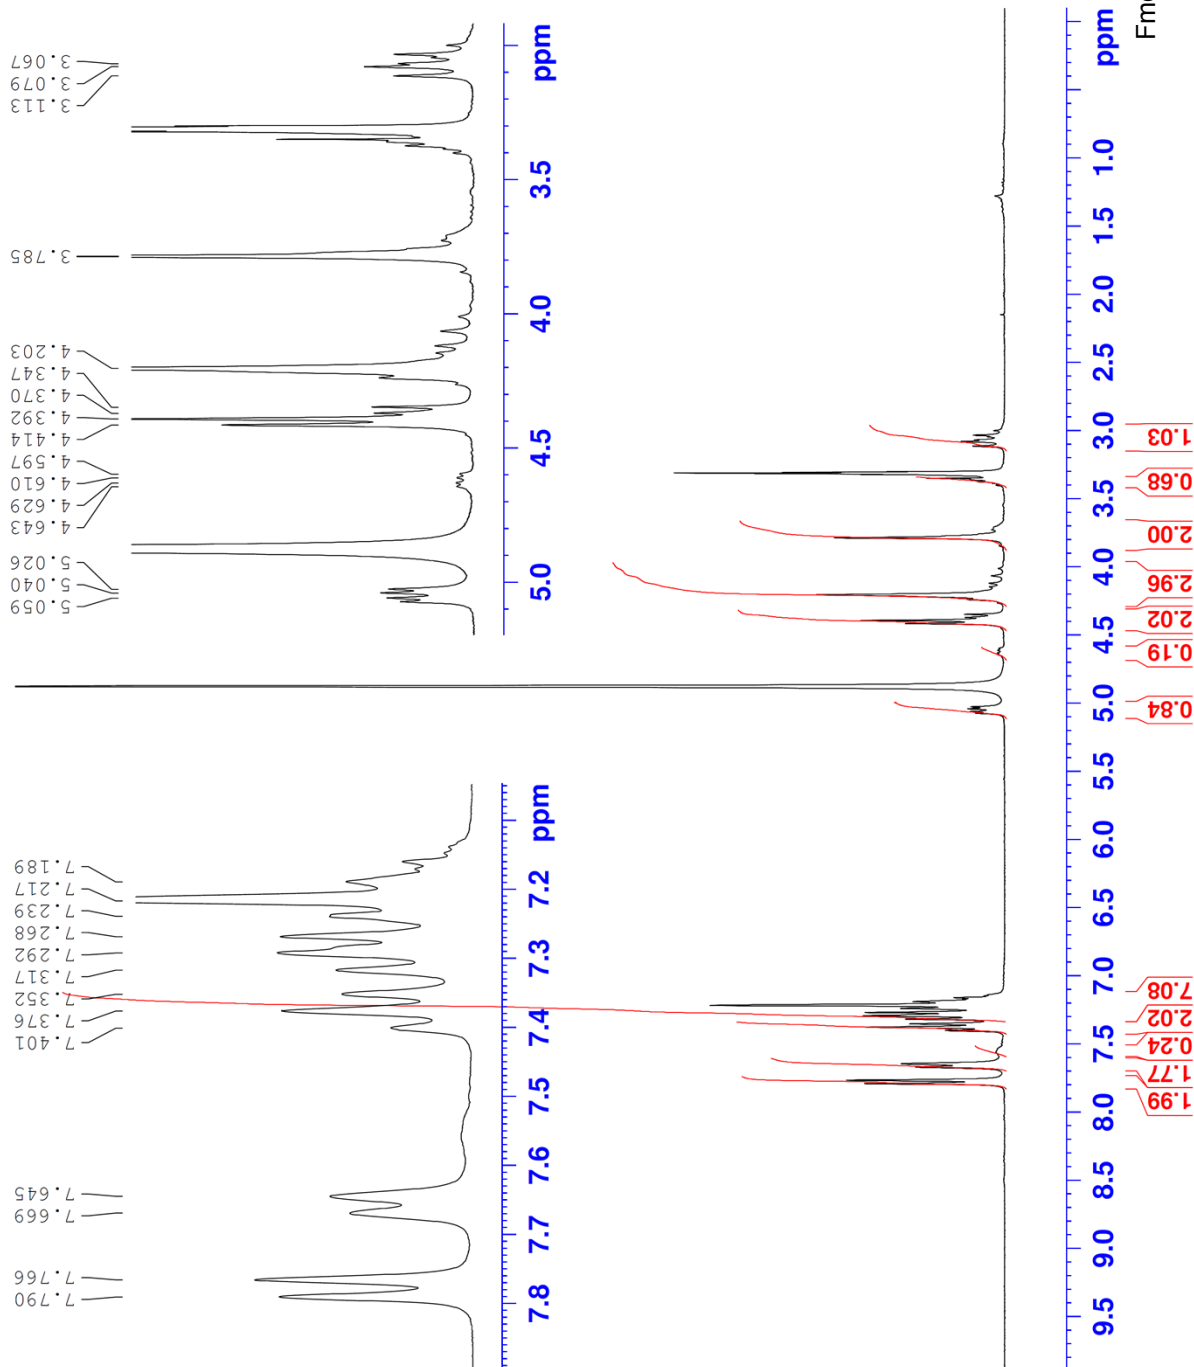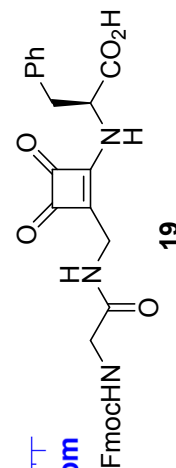

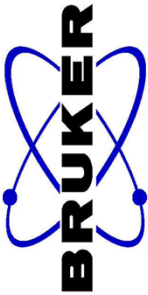

Current Data Parameters  
 NAME MK-Fmoc-Gly-SgGly-Phe-OH-Cl3  
 EXPNO 10  
 PROCNO 1

F2 - Acquisition Parameters

Date\_ 20140724  
 Time 2.12  
 INSTRUM av300  
 PROBHD 5 mm PABBO BB-  
 PULPROG zgpg30  
 ID 65536  
 SOLVENT MeOD  
 NS 3200  
 DS 2  
 SWH 18028.846 Hz  
 FIDRES 0.275098 Hz  
 AQ 1.8175818 sec  
 RG 203  
 DW 27.733 usec  
 DE 6.50 usec  
 TE 296.3 K  
 D1 2.00000000 sec  
 D11 0.03000000 sec

===== CHANNEL f1 =====

NUC1 <sup>13</sup>C  
 P1 10.00 usec  
 PL1 32.00000000 W  
 SFO1 75.4752953 MHz

===== CHANNEL f2 =====

CPDPRG2 waltz16  
 NUC2 <sup>1</sup>H  
 PCPD2 90.00 usec  
 PLW2 7.80000019 W  
 PLW12 0.21667001 W  
 PLW13 0.17550001 W  
 SFO2 300.1312005 MHz

F2 - Processing parameters

SI 32768  
 SF 75.4676448 MHz  
 WDW EM  
 SSB 0  
 LB 1.00 Hz  
 GB 0  
 PC 1.40

68.24  
 60.99  
 59.61  
 48.34  
 45.00  
 44.82  
 39.91  
 39.24  
 34.58  
 34.34

193.37  
 192.88  
 192.30  
 184.67  
 173.30  
 173.23  
 172.38  
 164.25  
 159.30  
 145.23  
 145.21  
 142.59  
 137.79  
 137.55  
 130.70  
 130.53  
 129.72  
 129.59  
 128.78  
 128.24  
 128.14  
 128.06  
 126.21  
 120.92

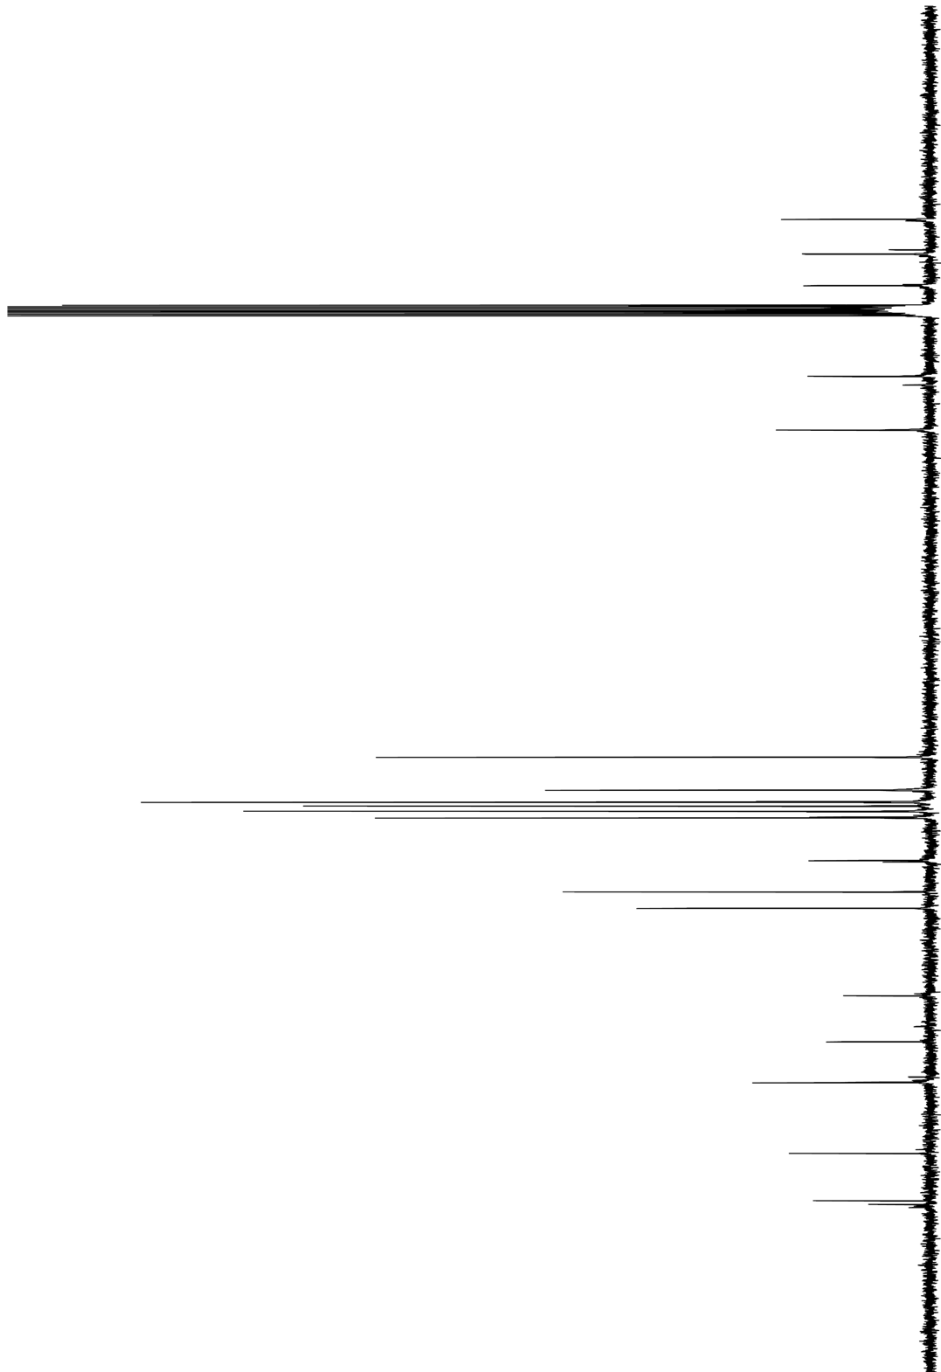

FmocHN <sup>13</sup>C ppm

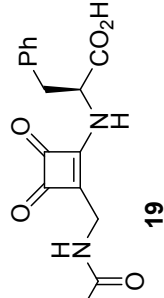

F:\FmocGlySQPhe(CO2Bu)OPr.als

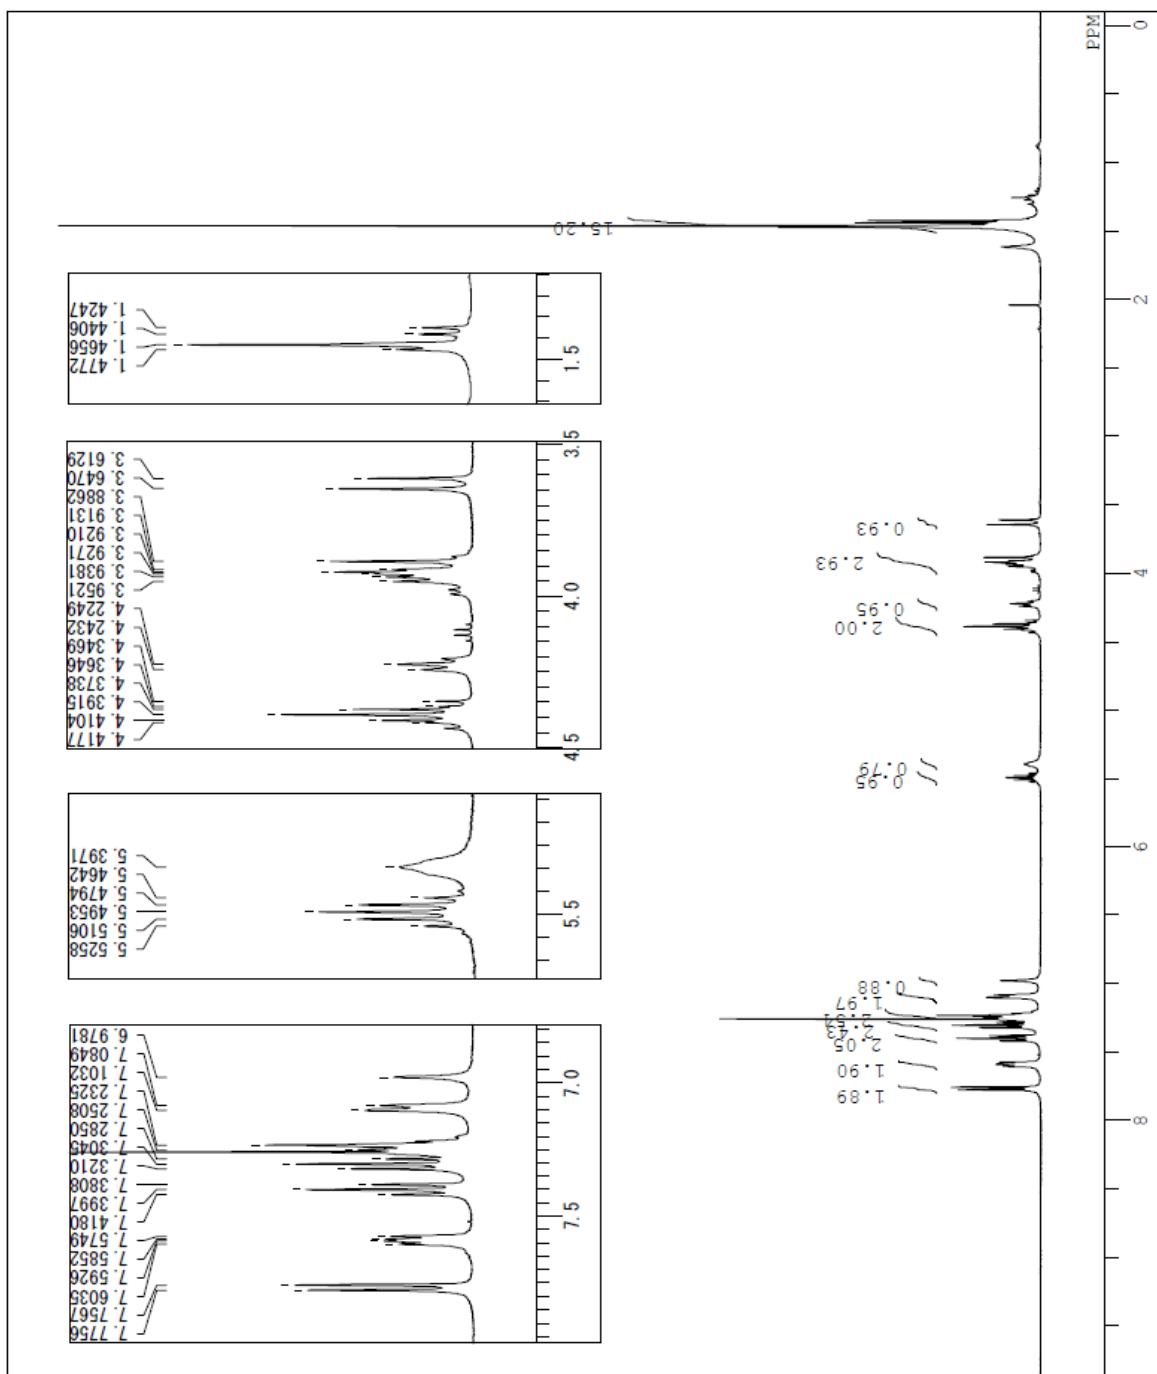

F:\FmocGlySQPhe(CO2Bu)OPr.a

DFILE  
COMNT  
DATIN  
OBNUC  
EXMOD  
OBFRO  
OBSET  
OBFIN  
POINT  
FREQU  
SCANS  
ACQTM  
PD  
FW1  
IRNUC  
CTEMP  
SLVNT  
EXREF  
BF  
RGAIN

Tue Jan 08 20:06:26 2013  
1H  
non  
399.65 MHz  
0.00 KHz  
134300.0 Hz  
32768  
7993.6 Hz  
8  
4.099 sec  
2.901 sec  
6.2 us  
1H  
23.4 c  
CDCL3  
7.26 ppm  
0.62 Hz  
18

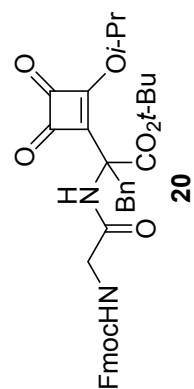

F:\FmocGlySQPhe(CO2Bu)OPr-carbon.als

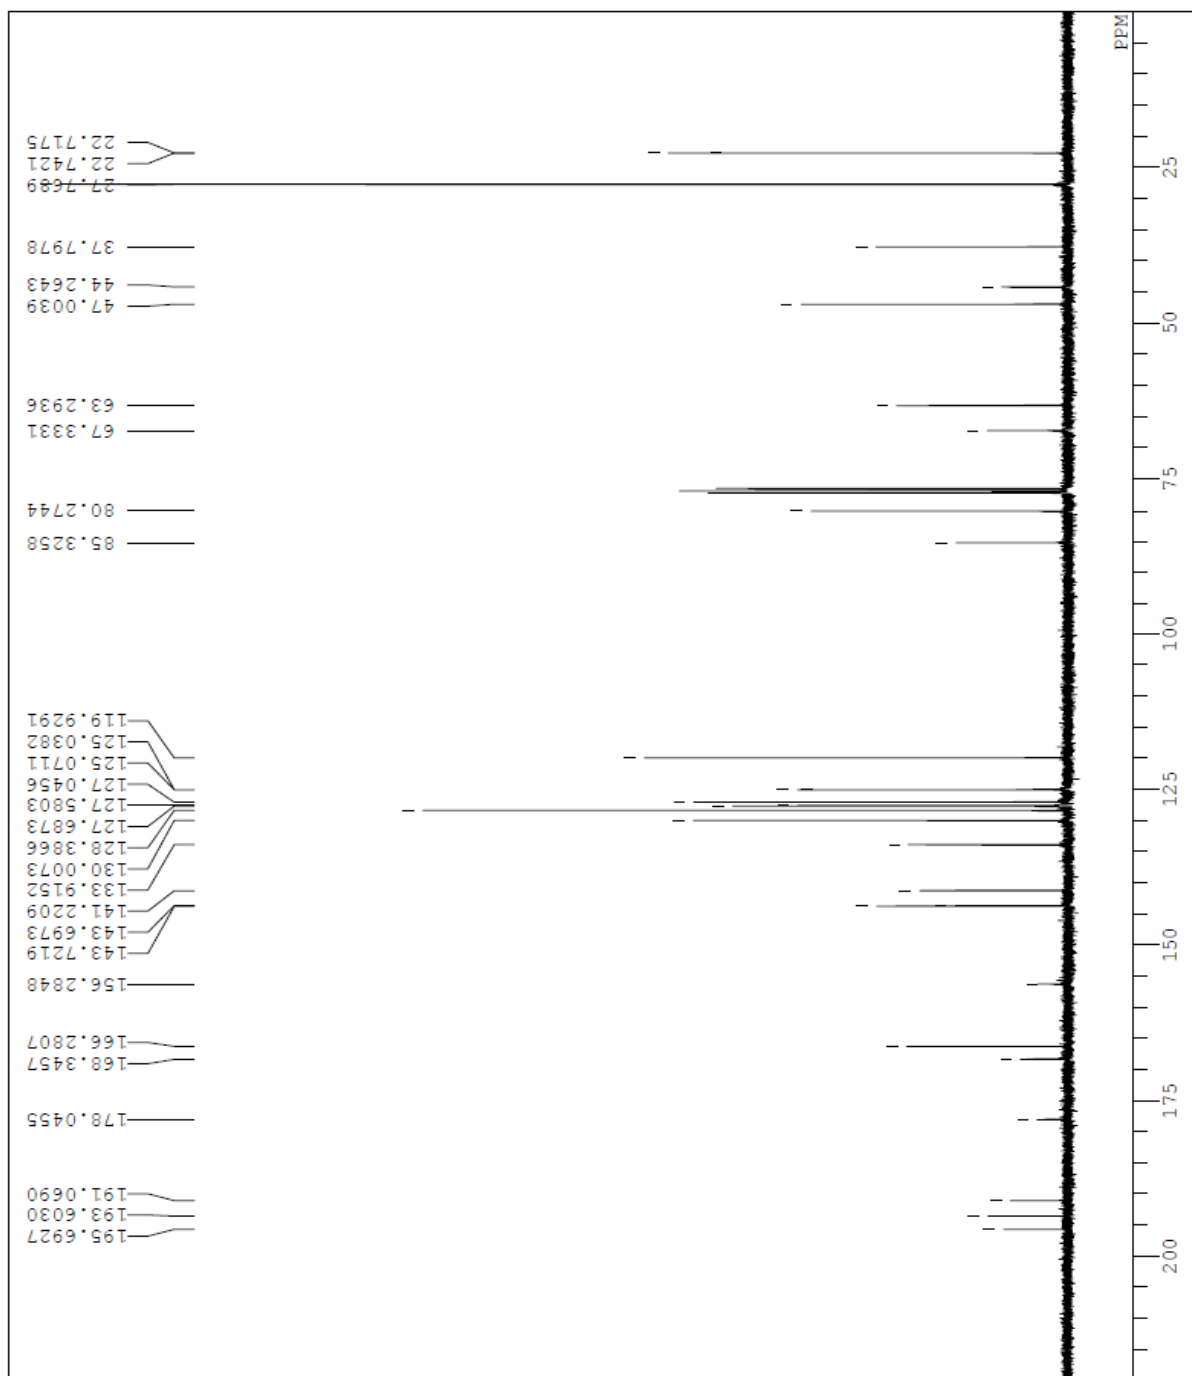

DFILE F:\FmocGlySQPhe(CO2Bu)OPr-c  
 COMNT Wed Jan 09 23:31:13 2013  
 DATIM 13C  
 OBNUC bcm  
 EXMOD 100.40 MHz  
 OBFRQ 0.00 KHz  
 OBSET 135500.0 Hz  
 OBFIN 32768  
 POINT 27100.3 Hz  
 FREQU 1024  
 SCANS 1.209 sec  
 ACQTM 1.791 sec  
 PD 5.0 us  
 PW1 1H  
 IRNUC 25.4 c  
 CTEMP CDCL3  
 SLVNT 77.00 ppm  
 EXREF 0.62 Hz  
 BF 26  
 RGAIN

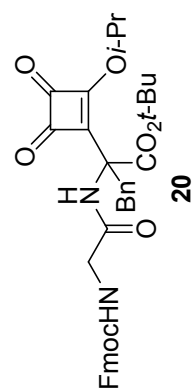

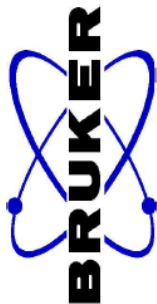

Current Data Parameters  
 NAME 7-20-1  
 EXPNO 10  
 PROCNO 1

F2 - Acquisition Parameters  
 Date\_ 20140416  
 Time 20.09  
 INSTRUM av300  
 PROBHD 5 mm PABBO BB-  
 PULPROG zg30  
 TD 65536  
 SOLVENT MeOD  
 NS 8  
 DS 2  
 SWH 6188.119 Hz  
 FIDRES 0.094423 Hz  
 AQ 5.2953587 sec  
 RG 203  
 DW 80.800 usec  
 DE 6.50 usec  
 TE 295.8 K  
 D1 1.00000000 sec

===== CHANNEL f1 =====  
 NUC1 1H  
 P1 15.00 usec  
 PLW1 7.5000000 W  
 SFO1 300.1318534 MHz

F2 - Processing parameters  
 SI 32768  
 SF 300.1300107 MHz  
 WDW EM  
 SSB 0  
 LB 0  
 GB 0  
 PC 1.00

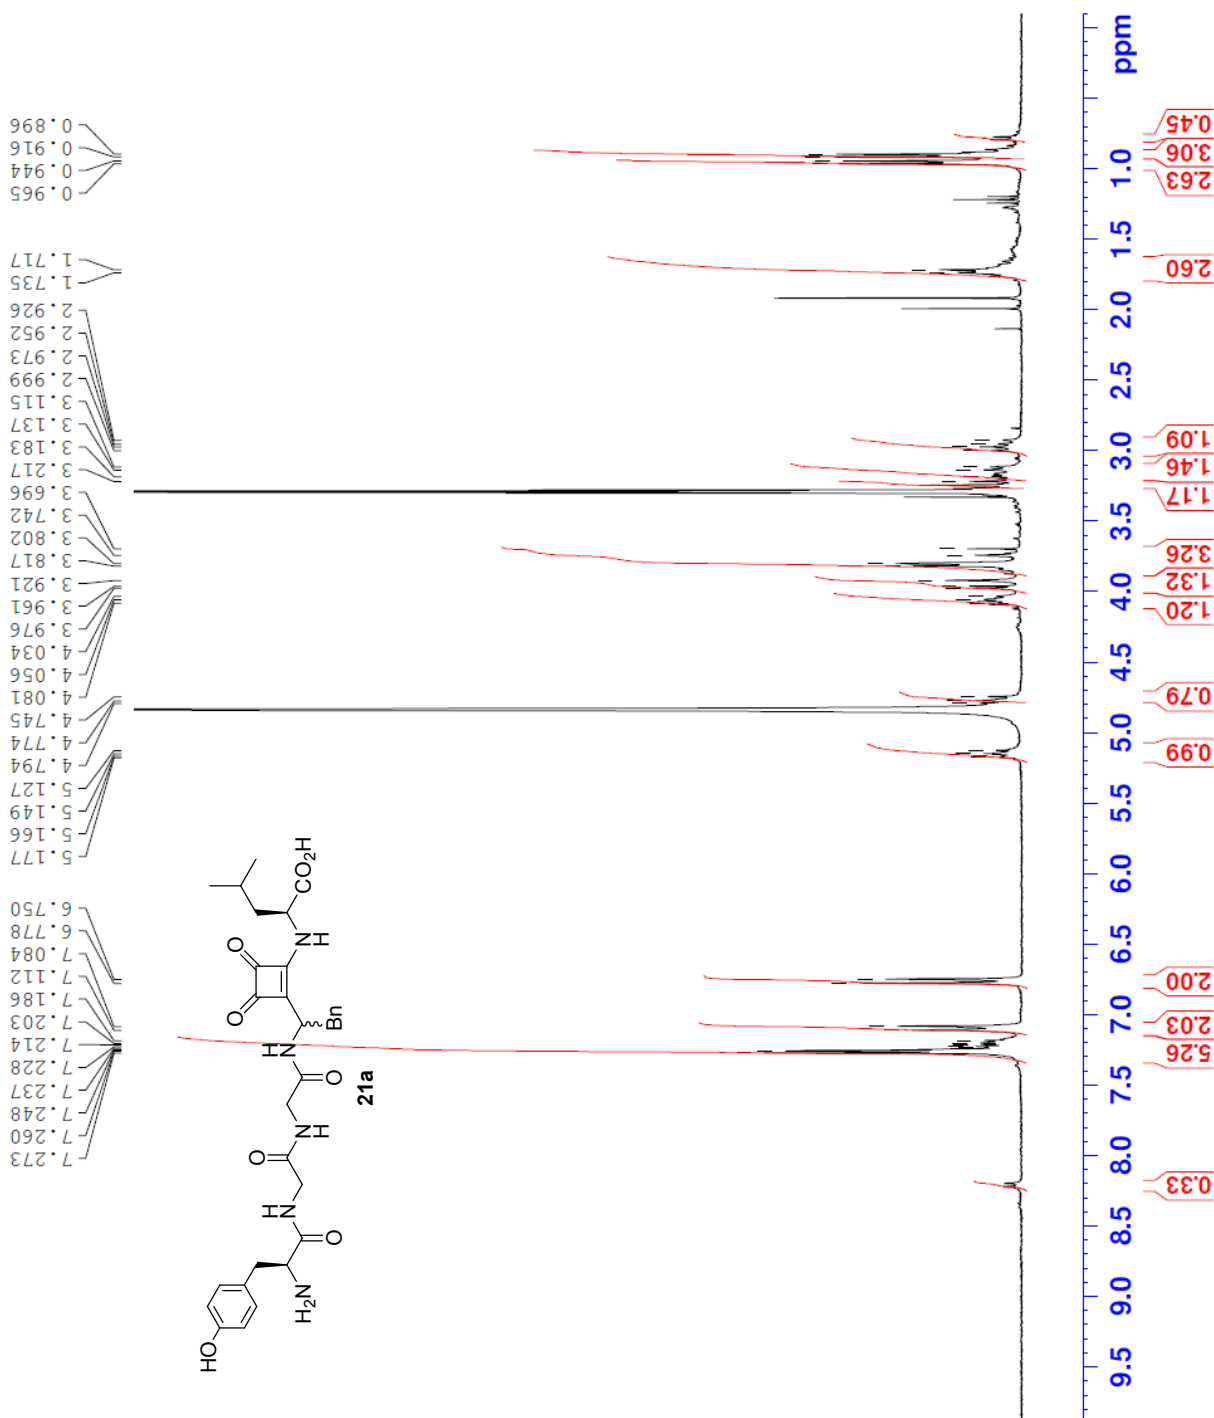

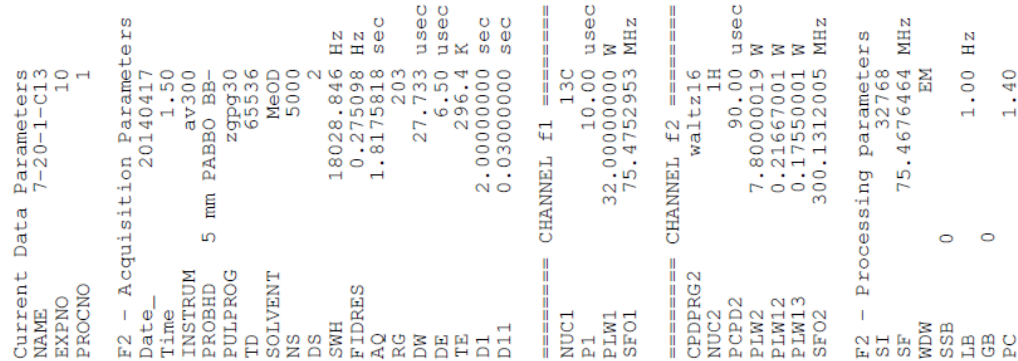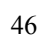

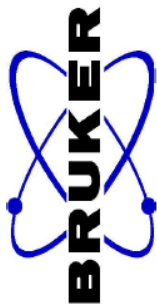

Current Data Parameters  
 NAME 7-20-2  
 EXPNO 10  
 PROCNO 1

F2 - Acquisition Parameters

Date\_ 20140416  
 Time 20.13  
 INSTRUM av300  
 PROBHD 5 mm PABBO BB-  
 PULPROG zg30  
 TD 65536  
 SOLVENT MeOD  
 NS 8  
 DS 2  
 SWH 6188.119 Hz  
 FIDRES 0.094423 Hz  
 AQ 5.2953587 sec  
 RG 203  
 DW 80.800 usec  
 DE 6.50 usec  
 TE 295.8 K  
 D1 1.00000000 sec

===== CHANNEL f1 =====  
 NUC1 1H  
 P1 15.00 usec  
 PLW1 7.5000000 W  
 SFO1 300.1318534 MHz

F2 - Processing parameters  
 SI 32768  
 SF 300.1300070 MHz  
 WDW EM  
 SSB 0  
 LB 0.30 Hz  
 GB 0  
 PC 1.00

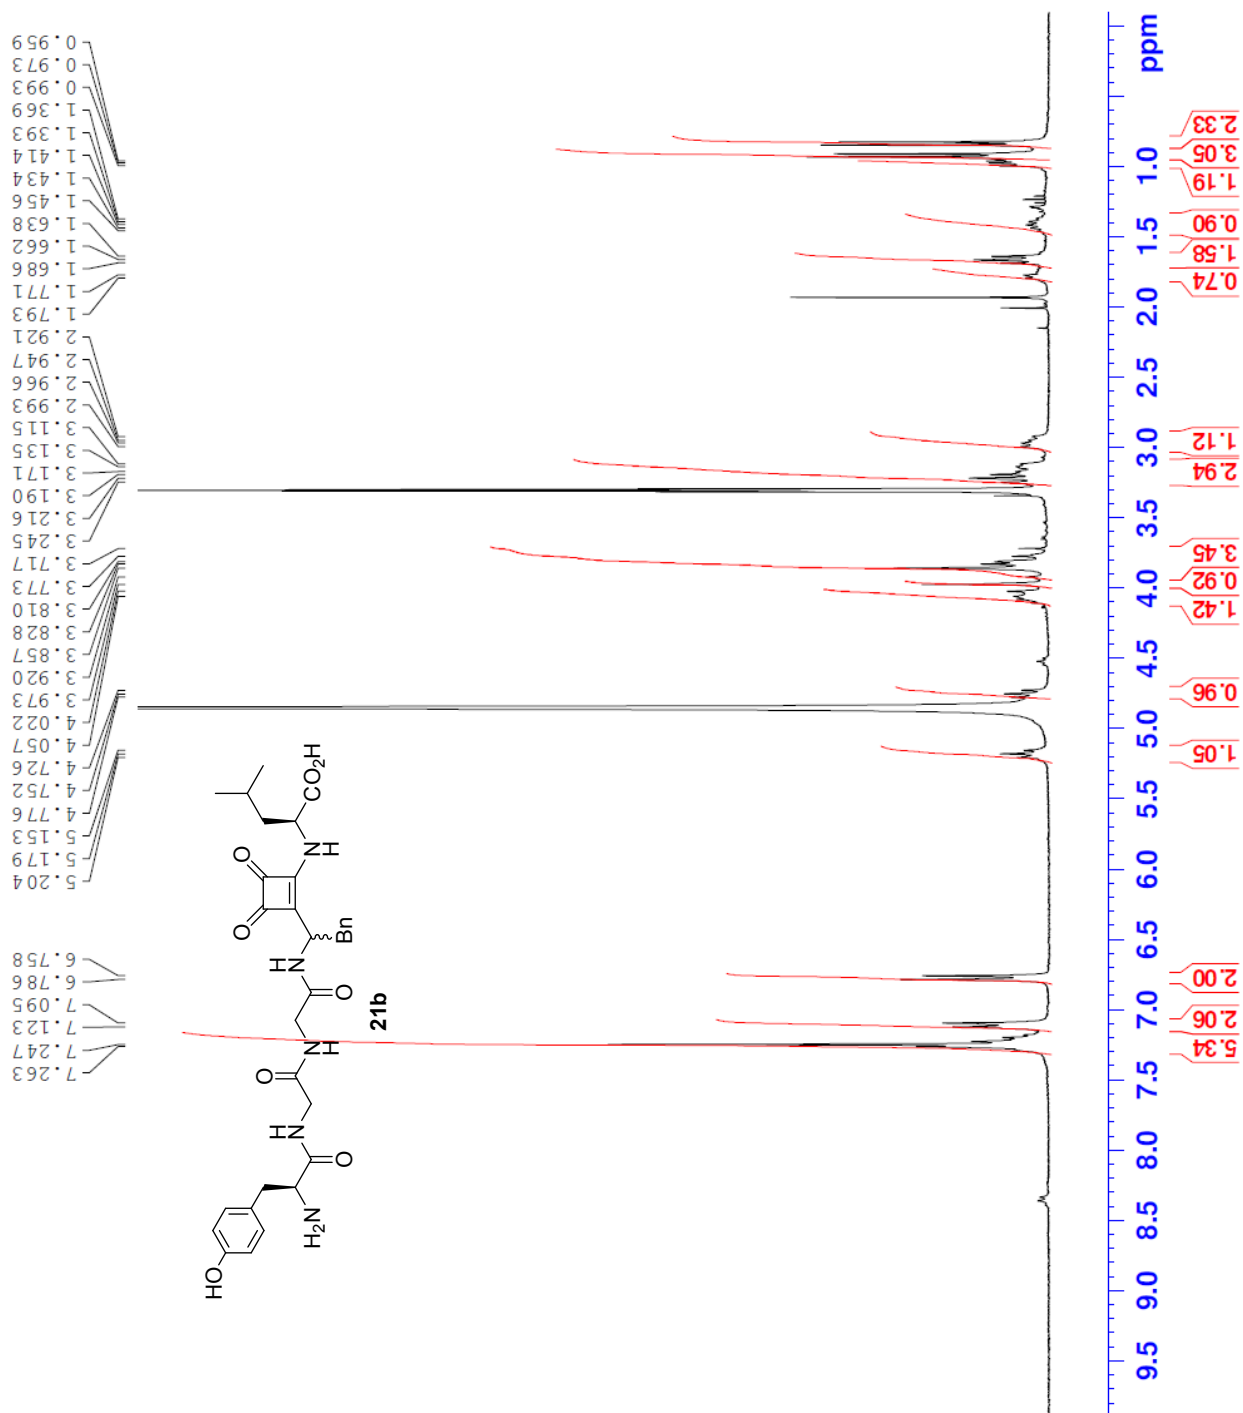

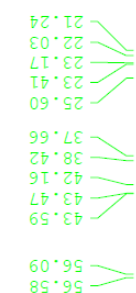

| Hours per week | Number of students |
|----------------|--------------------|
| 1              | 138.05             |
| 2              | 130.21             |
| 3              | 130.14             |
| 4              | 129.57             |
| 5              | 128.00             |
| 6              | 125.99             |
| 7              | 116.86             |
| 8              | 184.25             |
| 9              | 174.44             |
| 10             | 171.67             |
| 11             | 171.33             |
| 12             | 170.60             |
| 13             | 168.89             |
| 14             | 192.58             |
| 15             | 193.69             |

| F2 - Acquisition Parameters |                |
|-----------------------------|----------------|
| Date_                       | Time           |
| 20140417                    | 7.16           |
| INSTRUM                     | av300          |
| PROBHD                      | 5 mm PABBO BB- |
| PULPROG                     | zgpg30         |
| ID                          | 65536          |
| SOLVENT                     | MeOD           |
| NS                          | 5000           |
| DS                          | 2              |
| SWH                         | 18028.846 Hz   |
| FIDRES                      | 0.275098 Hz    |
| AQ                          | 1.8175818 sec  |
| RG                          | 203            |
| DW                          | 27.733 usec    |
| DE                          | 6.50 usec      |
| TE                          | 296.3 K        |
| D1                          | 2.00000000 sec |
| D11                         | 0.03000000 sec |

```
===== CHANNEL f1 =====
NUC1      13C
P1         10.00 usec
PLW1      32.00000000 W
SF01      75.4752953 MHz
```

```
===== CHANNEL f2 =====
CPDRG2      waltz16
NUC2        1H
            90.00 usec
PLW2        7.80000019 W
PLW12       0.21667001 W
PLW13       0.17550001 W
SF02        300.13120095 MHz
```

|                            |                |
|----------------------------|----------------|
| F2 - Processing parameters |                |
| SI                         | 32768          |
| SF                         | 75.4676446 MHz |
| WDW                        | EM             |
| SSB                        | 0              |
| LB                         | 1.00 Hz        |
| GB                         | 0              |
| PC                         | 1.40           |

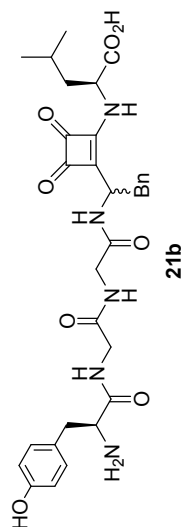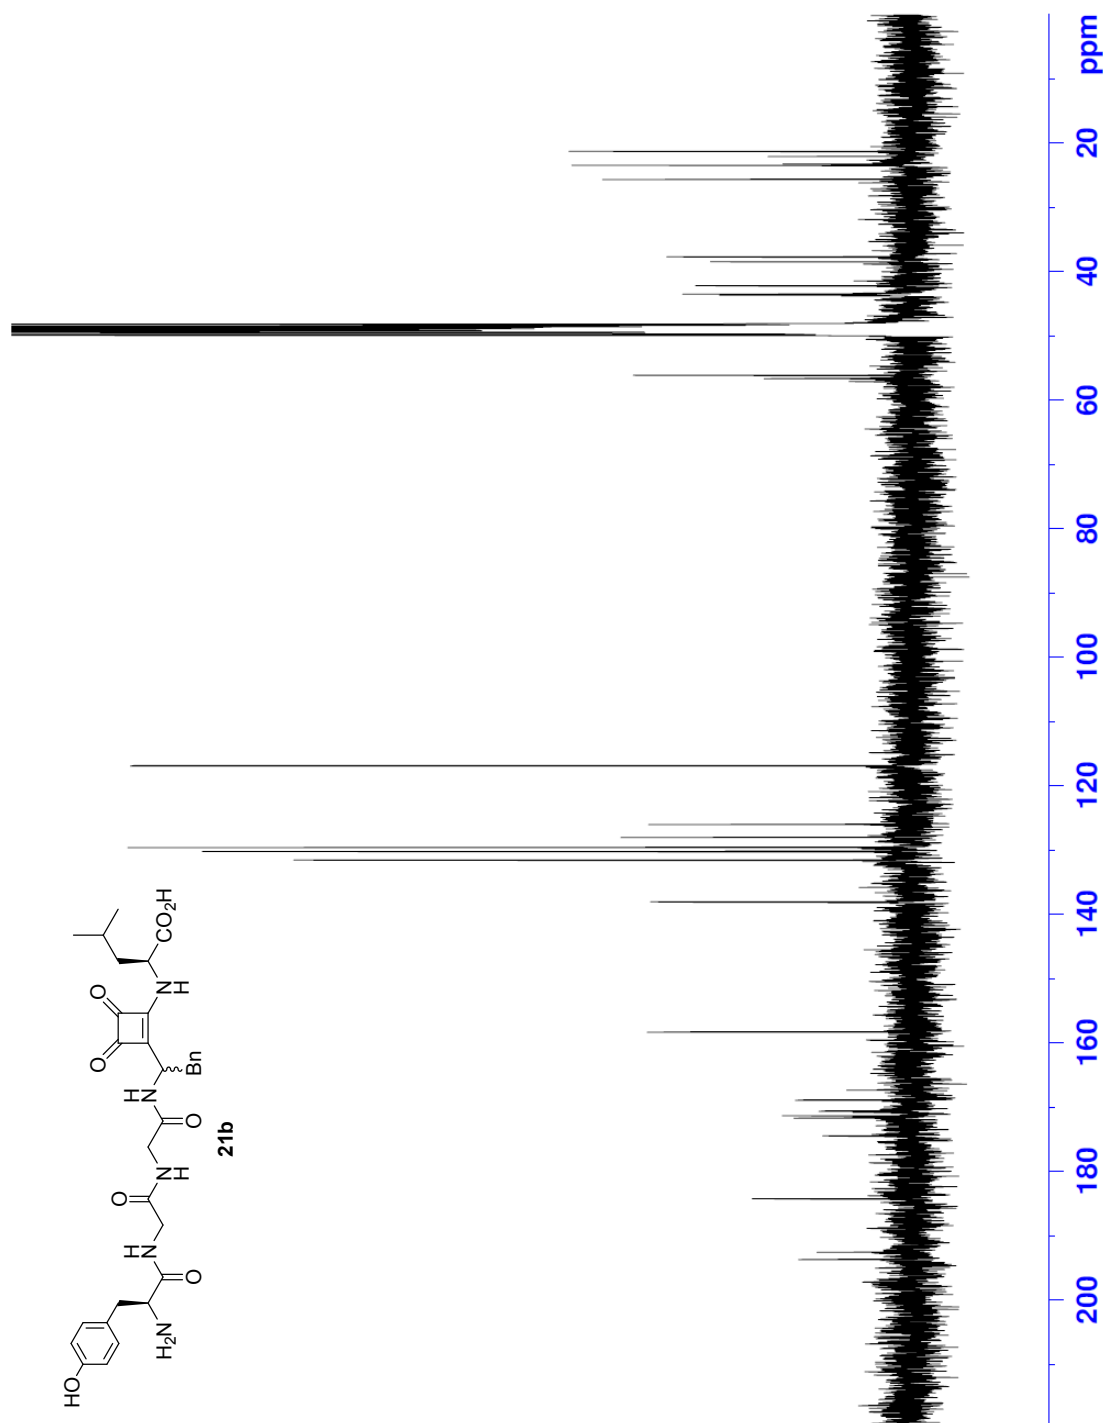

Supplement: c4ra10442k1.pdf [file c4ra10442k1.pdf]
